# Supplementary material for: Years of life lost due to traumatic brain injury in Europe: A cross-sectional analysis of 16 countries
Source: PubMed Central journal article supplement (PMC5507416; doi:10.1371/journal.pmed.1002331), 2017-07-11
Supplement: pmed.1002331.s001.pdf [file pmed.1002331.s001.pdf]

**S1 Appendix. Numbers of TBI YLLs and crude TBI YLL rates by age group and sex.**

**Table-A: Numbers of TBI YLLs in 16 European countries in 2013 by age group, for both sexes combined**

| <b>Country/<br/>Age group</b> | <b>0-4</b>  | <b>5-9</b>  | <b>10-14</b> | <b>15-19</b> | <b>20-24</b> | <b>25-29</b> | <b>30-34</b> | <b>35-39</b> | <b>40-44</b> | <b>45-49</b> | <b>50-54</b> | <b>55-59</b> | <b>60-64</b> | <b>65-69</b> | <b>70-74</b> | <b>75-79</b> | <b>80-84</b> | <b>85 +</b> | <b>Total</b>  |
|-------------------------------|-------------|-------------|--------------|--------------|--------------|--------------|--------------|--------------|--------------|--------------|--------------|--------------|--------------|--------------|--------------|--------------|--------------|-------------|---------------|
| <b>Austria</b>                | 313         | 332         | 865          | 1202         | 992          | 1115         | 676          | 953          | 1690         | 1726         | 1435         | 143          | 1307         | 1114         | 1851         | 1203         | 1208         | 876         | <b>19001</b>  |
| <b>Bulgaria</b>               | 860         | 402         | 926          | 2130         | 1203         | 1410         | 1506         | 1549         | 1257         | 1291         | 1286         | 211          | 1537         | 1045         | 595          | 561          | 406          | 125         | <b>18300</b>  |
| <b>Croatia</b>                | 307         | 130         | 1240         | 807          | 828          | 698          | 728          | 824          | 816          | 876          | 1338         | 150          | 1095         | 472          | 648          | 745          | 508          | 270         | <b>12480</b>  |
| <b>Cyprus</b>                 | 0           | 0           | 419          | 450          | 209          | 137          | 86           | 115          | 103          | 53           | 25           | 0            | 188          | 82           | 54           | 43           | 42           | 18          | <b>2024</b>   |
| <b>Denmark</b>                | 243         | 265         | 1007         | 875          | 367          | 521          | 468          | 725          | 661          | 754          | 419          | 228          | 417          | 481          | 343          | 294          | 273          | 151         | <b>8492</b>   |
| <b>Estonia</b>                | 323         | 139         | 368          | 624          | 410          | 654          | 433          | 599          | 664          | 796          | 565          | 76           | 502          | 305          | 223          | 194          | 25           | 30          | <b>6930</b>   |
| <b>Hungary</b>                | 477         | 207         | 1176         | 1719         | 1877         | 1385         | 1740         | 1620         | 1888         | 1975         | 2896         | 151          | 2196         | 1422         | 1462         | 1038         | 837          | 479         | <b>24545</b>  |
| <b>Ireland</b>                | 160         | 128         | 368          | 1097         | 743          | 697          | 347          | 533          | 432          | 533          | 549          | 360          | 308          | 347          | 214          | 183          | 183          | 113         | <b>7295</b>   |
| <b>Italy</b>                  | 1756        | 1279        | 6991         | 9739         | 8313         | 7239         | 6329         | 6609         | 6258         | 5390         | 4110         | 729          | 4239         | 4250         | 4526         | 5920         | 5333         | 3280        | <b>92290</b>  |
| <b>Lithuania</b>              | 83          | 66          | 608          | 1139         | 1000         | 1084         | 1177         | 1604         | 1540         | 1943         | 1497         | 223          | 1049         | 738          | 590          | 516          | 225          | 122         | <b>15204</b>  |
| <b>Luxembourg</b>             | 0           | 65          | 61           | 55           | 214          | 95           | 42           | 151          | 163          | 57           | 150          | 0            | 22           | 49           | 54           | 67           | 31           | 27          | <b>1303</b>   |
| <b>Romania</b>                | 2440        | 1225        | 3919         | 4338         | 3760         | 3082         | 4481         | 5127         | 4997         | 3759         | 4763         | 1118         | 4262         | 2625         | 2301         | 1505         | 877          | 333         | <b>54912</b>  |
| <b>Serbia</b>                 | 310         | 544         | 1286         | 2411         | 2043         | 2224         | 1196         | 1577         | 1779         | 1516         | 1600         | 521          | 2092         | 993          | 873          | 1193         | 615          | 127         | <b>22900</b>  |
| <b>Slovakia</b>               | 78          | 342         | 691          | 1210         | 990          | 1275         | 1016         | 1218         | 1713         | 1564         | 1836         | 371          | 1703         | 974          | 908          | 687          | 481          | 230         | <b>17287</b>  |
| <b>Slovenia</b>               | 0           | 0           | 0            | 396          | 102          | 338          | 126          | 266          | 108          | 256          | 414          | 0            | 329          | 151          | 279          | 246          | 235          | 135         | <b>3381</b>   |
| <b>United Kingdom</b>         | 2055        | 398         | 4547         | 6354         | 4998         | 3953         | 3887         | 4893         | 5267         | 5895         | 3983         | 873          | 3000         | 3890         | 3123         | 3773         | 4249         | 3159        | <b>68297</b>  |
| <b>Total</b>                  | <b>9405</b> | <b>5522</b> | <b>24472</b> | <b>34546</b> | <b>28049</b> | <b>25907</b> | <b>24238</b> | <b>28363</b> | <b>29336</b> | <b>28384</b> | <b>26866</b> | <b>5154</b>  | <b>24246</b> | <b>18938</b> | <b>18044</b> | <b>18168</b> | <b>15528</b> | <b>9475</b> | <b>374641</b> |

**Table-B: Numbers of TBI YLLs in 16 European countries in 2013 by age group, for males**

| <b>Country/Age group</b> | <b>0-4</b>  | <b>5-9</b>  | <b>10-14</b> | <b>15-19</b> | <b>20-24</b> | <b>25-29</b> | <b>30-34</b> | <b>35-39</b> | <b>40-44</b> | <b>45-49</b> | <b>50-54</b> | <b>55-59</b> | <b>60-64</b> | <b>65-69</b> | <b>70-74</b> | <b>75-79</b> | <b>80-84</b> | <b>85 +</b> | <b>Total</b>  |
|--------------------------|-------------|-------------|--------------|--------------|--------------|--------------|--------------|--------------|--------------|--------------|--------------|--------------|--------------|--------------|--------------|--------------|--------------|-------------|---------------|
| <b>Austria</b>           | 149         | 193         | 729          | 1016         | 765          | 809          | 581          | 785          | 1209         | 1430         | 1292         | 143          | 1139         | 884          | 1306         | 766          | 782          | 387         | <b>14365</b>  |
| <b>Bulgaria</b>          | 530         | 328         | 790          | 1756         | 921          | 1201         | 1412         | 1291         | 1147         | 1095         | 1086         | 211          | 1247         | 807          | 388          | 414          | 219          | 84          | <b>14927</b>  |
| <b>Croatia</b>           | 226         | 130         | 969          | 559          | 828          | 645          | 543          | 781          | 777          | 781          | 1162         | 0            | 834          | 433          | 403          | 481          | 268          | 115         | <b>9935</b>   |
| <b>Cyprus</b>            | 0           | 0           | 419          | 450          | 209          | 137          | 41           | 115          | 67           | 53           | 25           | 0            | 141          | 64           | 40           | 20           | 23           | 7           | <b>1811</b>   |
| <b>Denmark</b>           | 76          | 195         | 607          | 564          | 367          | 418          | 376          | 554          | 623          | 559          | 362          | 0            | 297          | 382          | 264          | 137          | 149          | 64          | <b>5994</b>   |
| <b>Estonia</b>           | 77          | 65          | 301          | 561          | 410          | 654          | 337          | 517          | 585          | 763          | 537          | 0            | 384          | 285          | 128          | 132          | 16           | 14          | <b>5766</b>   |
| <b>Hungary</b>           | 311         | 133         | 974          | 1348         | 1652         | 918          | 1413         | 1328         | 1478         | 1617         | 2247         | 0            | 1622         | 1204         | 966          | 550          | 435          | 208         | <b>18404</b>  |
| <b>Ireland</b>           | 77          | 128         | 303          | 851          | 574          | 697          | 252          | 450          | 395          | 338          | 462          | 285          | 263          | 244          | 103          | 80           | 56           | 38          | <b>5596</b>   |
| <b>Italy</b>             | 689         | 922         | 5395         | 7706         | 7002         | 5798         | 5101         | 5185         | 4978         | 4366         | 3030         | 423          | 3198         | 3209         | 2978         | 3691         | 2754         | 1383        | <b>67808</b>  |
| <b>Lithuania</b>         | 0           | 66          | 542          | 1015         | 828          | 981          | 1085         | 1227         | 1282         | 1680         | 1156         | 70           | 788          | 564          | 515          | 324          | 116          | 38          | <b>12277</b>  |
| <b>Luxembourg</b>        | 0           | 65          | 61           | 55           | 102          | 95           | 42           | 151          | 126          | 57           | 94           | 0            | 22           | 49           | 40           | 41           | 13           | 16          | <b>1029</b>   |
| <b>Romania</b>           | 1293        | 655         | 2788         | 3652         | 3251         | 2467         | 4051         | 4585         | 4317         | 3147         | 4063         | 502          | 3517         | 2015         | 1553         | 1041         | 542          | 217         | <b>43656</b>  |
| <b>Serbia</b>            | 227         | 261         | 1025         | 1789         | 1642         | 1965         | 1008         | 1152         | 1517         | 1157         | 1404         | 140          | 1682         | 777          | 591          | 817          | 395          | 73          | <b>17622</b>  |
| <b>Slovakia</b>          | 78          | 128         | 425          | 1027         | 878          | 1116         | 967          | 922          | 1386         | 1435         | 1524         | 217          | 1586         | 757          | 705          | 460          | 201          | 116         | <b>13928</b>  |
| <b>Slovenia</b>          | 0           | 0           | 0            | 332          | 102          | 284          | 126          | 184          | 69           | 256          | 356          | 0            | 280          | 133          | 184          | 179          | 121          | 60          | <b>2666</b>   |
| <b>United Kingdom</b>    | 986         | 398         | 3012         | 4618         | 4092         | 3118         | 3048         | 3550         | 4180         | 4280         | 2792         | 567          | 2370         | 2471         | 1717         | 2093         | 2363         | 1433        | <b>47088</b>  |
| <b>Total</b>             | <b>4719</b> | <b>3667</b> | <b>18340</b> | <b>27299</b> | <b>23623</b> | <b>21303</b> | <b>20383</b> | <b>22777</b> | <b>24136</b> | <b>23014</b> | <b>21592</b> | <b>2558</b>  | <b>19370</b> | <b>14278</b> | <b>11881</b> | <b>11226</b> | <b>8453</b>  | <b>4253</b> | <b>282872</b> |

**Table-C: Numbers of TBI YLLs in 16 European countries in 2013 by age group, for females**

| <b>Country/Age group</b> | <b>0-4</b>  | <b>5-9</b>  | <b>10-14</b> | <b>15-19</b> | <b>20-24</b> | <b>25-29</b> | <b>30-34</b> | <b>35-39</b> | <b>40-44</b> | <b>45-49</b> | <b>50-54</b> | <b>55-59</b> | <b>60-64</b> | <b>65-69</b> | <b>70-74</b> | <b>75-79</b> | <b>80-84</b> | <b>85 +</b> | <b>Total</b> |
|--------------------------|-------------|-------------|--------------|--------------|--------------|--------------|--------------|--------------|--------------|--------------|--------------|--------------|--------------|--------------|--------------|--------------|--------------|-------------|--------------|
| <b>Austria</b>           | 164         | 139         | 136          | 186          | 227          | 306          | 95           | 168          | 481          | 296          | 143          | 0            | 168          | 230          | 545          | 437          | 426          | 489         | <b>4636</b>  |
| <b>Bulgaria</b>          | 330         | 74          | 136          | 374          | 282          | 209          | 94           | 258          | 110          | 196          | 200          | 0            | 290          | 238          | 207          | 147          | 187          | 41          | <b>3373</b>  |
| <b>Croatia</b>           | 81          | 0           | 271          | 248          | 0            | 53           | 185          | 43           | 39           | 95           | 176          | 150          | 261          | 39           | 245          | 264          | 240          | 155         | <b>2545</b>  |
| <b>Cyprus</b>            | 0           | 0           | 0            | 0            | 0            | 0            | 45           | 0            | 36           | 0            | 0            | 0            | 47           | 18           | 14           | 23           | 19           | 11          | <b>213</b>   |
| <b>Denmark</b>           | 167         | 70          | 400          | 311          | 0            | 103          | 92           | 171          | 38           | 195          | 57           | 228          | 120          | 99           | 79           | 157          | 124          | 87          | <b>2498</b>  |
| <b>Estonia</b>           | 246         | 74          | 67           | 63           | 0            | 0            | 96           | 82           | 79           | 33           | 28           | 76           | 118          | 20           | 95           | 62           | 9            | 16          | <b>1164</b>  |
| <b>Hungary</b>           | 166         | 74          | 202          | 371          | 225          | 467          | 327          | 292          | 410          | 358          | 649          | 151          | 574          | 218          | 496          | 488          | 402          | 271         | <b>6141</b>  |
| <b>Ireland</b>           | 83          | 0           | 65           | 246          | 169          | 0            | 95           | 83           | 37           | 195          | 87           | 75           | 45           | 103          | 111          | 103          | 127          | 75          | <b>1699</b>  |
| <b>Italy</b>             | 1067        | 357         | 1596         | 2033         | 1311         | 1441         | 1228         | 1424         | 1280         | 1024         | 1080         | 306          | 1041         | 1041         | 1548         | 2229         | 2579         | 1897        | <b>24482</b> |
| <b>Lithuania</b>         | 83          | 0           | 66           | 124          | 172          | 103          | 92           | 377          | 258          | 263          | 341          | 153          | 261          | 174          | 75           | 192          | 109          | 84          | <b>2927</b>  |
| <b>Luxembourg</b>        | 0           | 0           | 0            | 0            | 112          | 0            | 0            | 0            | 37           | 0            | 56           | 0            | 0            | 0            | 14           | 26           | 18           | 11          | <b>274</b>   |
| <b>Romania</b>           | 1147        | 570         | 1131         | 686          | 509          | 615          | 430          | 542          | 680          | 612          | 700          | 616          | 745          | 610          | 748          | 464          | 335          | 116         | <b>11256</b> |
| <b>Serbia</b>            | 83          | 283         | 261          | 622          | 401          | 259          | 188          | 425          | 262          | 359          | 196          | 381          | 410          | 216          | 282          | 376          | 220          | 54          | <b>5278</b>  |
| <b>Slovakia</b>          | 0           | 214         | 266          | 183          | 112          | 159          | 49           | 296          | 327          | 129          | 312          | 154          | 117          | 217          | 203          | 227          | 280          | 114         | <b>3359</b>  |
| <b>Slovenia</b>          | 0           | 0           | 0            | 64           | 0            | 54           | 0            | 82           | 39           | 0            | 58           | 0            | 49           | 18           | 95           | 67           | 114          | 75          | <b>715</b>   |
| <b>United Kingdom</b>    | 1069        | 0           | 1535         | 1736         | 906          | 835          | 839          | 1343         | 1087         | 1615         | 1191         | 306          | 630          | 1419         | 1406         | 1680         | 1886         | 1726        | <b>21209</b> |
| <b>Total</b>             | <b>4686</b> | <b>1855</b> | <b>6132</b>  | <b>7247</b>  | <b>4426</b>  | <b>4604</b>  | <b>3855</b>  | <b>5586</b>  | <b>5200</b>  | <b>5370</b>  | <b>5274</b>  | <b>2596</b>  | <b>4876</b>  | <b>4660</b>  | <b>6163</b>  | <b>6942</b>  | <b>7075</b>  | <b>5222</b> | <b>91769</b> |

**Table-D: Crude TBI YLL rates per 100,000 in 16 European countries in 2013 by age group, for both sexes combined**

| <b>Country/Age group</b> | <b>0-4</b> | <b>5-9</b> | <b>10-14</b> | <b>15-19</b> | <b>20-24</b> | <b>25-29</b> | <b>30-34</b> | <b>35-39</b> | <b>40-44</b> | <b>45-49</b> | <b>50-54</b> | <b>55-59</b> | <b>60-64</b> | <b>65-69</b> | <b>70-74</b> | <b>75-79</b> | <b>80-84</b> | <b>85 +</b> | <b>Total</b> |
|--------------------------|------------|------------|--------------|--------------|--------------|--------------|--------------|--------------|--------------|--------------|--------------|--------------|--------------|--------------|--------------|--------------|--------------|-------------|--------------|
| <b>Austria</b>           | 78.6       | 82.2       | 207.5        | 253.0        | 183.5        | 200.5        | 119.9        | 174.2        | 263.4        | 242.5        | 216.8        | 26.1         | 277.2        | 267.5        | 422.9        | 456.4        | 554.3        | 424.6       | <b>224.1</b> |
| <b>Bulgaria</b>          | 249.7      | 121.4      | 291.7        | 650.9        | 270.1        | 288.5        | 299.5        | 278.9        | 237.5        | 269.2        | 256.7        | 41.0         | 294.8        | 230.5        | 172.7        | 192.4        | 204.8        | 105.0       | <b>251.9</b> |
| <b>Croatia</b>           | 145.1      | 63.0       | 579.2        | 328.0        | 328.9        | 251.3        | 247.1        | 287.9        | 292.9        | 292.2        | 429.0        | 47.5         | 388.1        | 224.5        | 317.3        | 419.9        | 431.2        | 396.1       | <b>293.3</b> |
| <b>Cyprus</b>            | 0.0        | 0.0        | 914.8        | 793.5        | 301.7        | 185.5        | 120.9        | 185.8        | 173.1        | 92.8         | 43.5         | 0.0          | 399.2        | 215.1        | 179.1        | 191.5        | 281.6        | 162.5       | <b>234.8</b> |
| <b>Denmark</b>           | 78.8       | 80.2       | 301.1        | 244.8        | 100.8        | 158.9        | 144.0        | 196.5        | 170.4        | 177.5        | 110.6        | 64.5         | 122.7        | 135.8        | 137.9        | 166.5        | 230.2        | 131.1       | <b>151.2</b> |
| <b>Estonia</b>           | 431.2      | 193.9      | 605.0        | 995.8        | 461.1        | 673.4        | 474.8        | 661.1        | 723.6        | 936.3        | 610.5        | 85.7         | 610.9        | 488.0        | 355.6        | 378.3        | 67.6         | 113.3       | <b>525.8</b> |
| <b>Hungary</b>           | 103.9      | 42.4       | 244.5        | 309.2        | 298.5        | 227.1        | 249.3        | 190.3        | 261.0        | 309.4        | 472.0        | 19.9         | 327.2        | 264.9        | 330.7        | 315.4        | 353.8        | 278.2       | <b>248.1</b> |
| <b>Ireland</b>           | 43.5       | 38.6       | 119.0        | 396.8        | 290.9        | 218.4        | 90.3         | 146.1        | 125.6        | 170.5        | 192.7        | 142.7        | 137.4        | 181.8        | 153.6        | 172.7        | 250.8        | 181.0       | <b>158.6</b> |
| <b>Italy</b>             | 64.3       | 45.0       | 247.3        | 342.5        | 268.1        | 220.9        | 171.4        | 148.5        | 129.7        | 109.5        | 93.8         | 18.8         | 116.5        | 126.6        | 148.1        | 227.9        | 267.9        | 179.6       | <b>153.2</b> |
| <b>Lithuania</b>         | 54.9       | 48.9       | 412.8        | 624.3        | 467.4        | 557.2        | 669.1        | 859.7        | 735.0        | 905.0        | 632.9        | 113.6        | 611.9        | 539.0        | 417.5        | 431.7        | 262.1        | 207.4       | <b>514.1</b> |
| <b>Luxembourg</b>        | 0.0        | 215.5      | 196.4        | 170.3        | 639.7        | 248.3        | 100.9        | 365.2        | 376.3        | 128.6        | 378.0        | 0.0          | 80.0         | 223.2        | 298.2        | 452.9        | 258.6        | 288.0       | <b>239.8</b> |
| <b>Romania</b>           | 248.5      | 115.3      | 365.3        | 398.2        | 304.9        | 225.2        | 314.5        | 325.2        | 311.3        | 284.1        | 394.1        | 77.5         | 323.6        | 282.4        | 275.8        | 204.1        | 181.8        | 113.3       | <b>274.8</b> |
| <b>Serbia</b>            | 93.5       | 157.5      | 366.3        | 620.8        | 477.1        | 469.5        | 242.5        | 313.5        | 373.8        | 319.6        | 314.5        | 93.2         | 376.7        | 264.3        | 262.6        | 409.6        | 332.7        | 138.0       | <b>319.6</b> |
| <b>Slovakia</b>          | 26.8       | 126.0      | 258.2        | 391.0        | 257.9        | 300.1        | 226.1        | 268.7        | 452.9        | 430.6        | 496.0        | 95.8         | 498.2        | 404.6        | 494.3        | 512.0        | 496.3        | 347.6       | <b>319.3</b> |
| <b>Slovenia</b>          | 0.0        | 0.0        | 0.0          | 405.6        | 89.0         | 245.2        | 81.5         | 171.8        | 73.6         | 163.9        | 271.2        | 0.0          | 240.4        | 154.9        | 307.8        | 334.8        | 430.6        | 337.9       | <b>164.1</b> |
| <b>United Kingdom</b>    | 51.2       | 10.6       | 128.4        | 163.5        | 115.8        | 90.8         | 90.1         | 122.6        | 117.4        | 125.9        | 91.7         | 23.2         | 84.4         | 112.0        | 122.6        | 180.3        | 274.1        | 215.6       | <b>106.5</b> |

**Table-E: Crude TBI YLL rates per 100,000 in 16 European countries in 2013 by age group, for males**

| Country/Age group     | 0-4   | 5-9   | 10-14  | 15-19  | 20-24 | 25-29  | 30-34  | 35-39  | 40-44  | 45-49  | 50-54  | 55-59 | 60-64  | 65-69  | 70-74  | 75-79 | 80-84 | 85 +  | Total        |
|-----------------------|-------|-------|--------|--------|-------|--------|--------|--------|--------|--------|--------|-------|--------|--------|--------|-------|-------|-------|--------------|
| <b>Austria</b>        | 72.7  | 93.3  | 341.1  | 416.5  | 278.1 | 288.6  | 205.0  | 288.0  | 378.6  | 398.6  | 389.2  | 53.1  | 501.1  | 450.9  | 651.9  | 676.3 | 924.2 | 665.1 | <b>347.0</b> |
| <b>Bulgaria</b>       | 299.6 | 192.5 | 484.2  | 1042.0 | 401.7 | 474.7  | 539.9  | 451.0  | 420.6  | 449.0  | 434.2  | 84.9  | 518.4  | 405.3  | 271.5  | 363.1 | 296.4 | 208.4 | <b>422.3</b> |
| <b>Croatia</b>        | 207.6 | 122.4 | 883.3  | 444.4  | 643.1 | 456.6  | 361.3  | 538.5  | 555.1  | 524.4  | 757.8  | 0.0   | 620.9  | 462.1  | 468.8  | 704.3 | 674.3 | 634.1 | <b>483.9</b> |
| <b>Cyprus</b>         | 0.0   | 0.0   | 1782.2 | 1547.5 | 591.6 | 374.8  | 120.7  | 405.2  | 246.3  | 196.6  | 89.3   | 0.0   | 608.1  | 348.5  | 279.3  | 196.6 | 366.7 | 160.0 | <b>431.9</b> |
| <b>Denmark</b>        | 48.0  | 115.3 | 354.9  | 307.5  | 198.0 | 251.8  | 230.4  | 300.0  | 319.1  | 260.1  | 189.9  | 0.0   | 176.8  | 219.3  | 222.4  | 171.2 | 302.4 | 173.4 | <b>215.2</b> |
| <b>Estonia</b>        | 200.4 | 176.1 | 962.0  | 1743.6 | 891.5 | 1306.2 | 720.1  | 1118.5 | 1268.4 | 1833.1 | 1217.6 | 0.0   | 1089.9 | 1130.1 | 559.7  | 802.5 | 156.5 | 258.0 | <b>936.7</b> |
| <b>Hungary</b>        | 131.9 | 53.1  | 394.2  | 472.6  | 511.4 | 294.3  | 400.4  | 308.0  | 405.2  | 509.2  | 758.4  | 0.0   | 538.6  | 524.9  | 557.1  | 481.0 | 579.7 | 458.2 | <b>390.8</b> |
| <b>Ireland</b>        | 41.1  | 75.5  | 191.8  | 597.7  | 442.3 | 456.3  | 135.9  | 249.4  | 229.6  | 216.7  | 326.7  | 227.2 | 235.7  | 256.0  | 151.7  | 163.5 | 181.3 | 188.1 | <b>245.9</b> |
| <b>Italy</b>          | 49.1  | 63.1  | 371.0  | 525.6  | 441.6 | 351.0  | 275.9  | 233.1  | 207.3  | 179.2  | 141.2  | 22.5  | 182.4  | 200.8  | 211.8  | 326.7 | 353.0 | 246.4 | <b>232.3</b> |
| <b>Lithuania</b>      | 0.0   | 95.6  | 715.1  | 1084.4 | 752.4 | 986.0  | 1225.8 | 1344.9 | 1268.1 | 1639.9 | 1047.0 | 79.2  | 1086.7 | 1050.9 | 1004.6 | 829.8 | 463.0 | 283.4 | <b>901.1</b> |
| <b>Luxembourg</b>     | 0.0   | 419.9 | 382.6  | 332.2  | 594.3 | 489.2  | 202.4  | 726.9  | 569.6  | 247.4  | 460.4  | 0.0   | 157.7  | 449.8  | 477.2  | 633.6 | 268.8 | 584.4 | <b>378.6</b> |
| <b>Romania</b>        | 256.2 | 120.0 | 506.2  | 654.6  | 507.5 | 347.8  | 555.9  | 569.8  | 525.6  | 466.2  | 675.9  | 72.8  | 579.9  | 489.4  | 450.4  | 364.7 | 305.4 | 220.5 | <b>447.6</b> |
| <b>Serbia</b>         | 132.9 | 146.9 | 567.6  | 894.1  | 748.8 | 812.1  | 401.8  | 453.2  | 637.9  | 494.6  | 565.1  | 51.7  | 639.4  | 453.4  | 408.5  | 681.6 | 553.6 | 229.7 | <b>505.2</b> |
| <b>Slovakia</b>       | 52.3  | 91.8  | 309.6  | 647.3  | 448.4 | 515.1  | 418.9  | 396.2  | 722.4  | 788.9  | 830.7  | 116.3 | 999.3  | 726.8  | 968.5  | 957.6 | 647.5 | 630.7 | <b>528.1</b> |
| <b>Slovenia</b>       | 0.0   | 0.0   | 0.0    | 662.0  | 172.8 | 395.7  | 155.0  | 227.1  | 90.6   | 322.7  | 458.1  | 0.0   | 410.1  | 289.5  | 456.8  | 607.2 | 654.8 | 616.9 | <b>261.4</b> |
| <b>United Kingdom</b> | 48.0  | 20.7  | 166.1  | 231.5  | 186.9 | 143.5  | 142.3  | 178.7  | 188.5  | 185.3  | 129.9  | 30.5  | 136.1  | 146.4  | 142.4  | 219.3 | 362.9 | 290.5 | <b>149.3</b> |

**Table-F: Crude TBI YLL rates per 100,000 in 16 European countries in 2013 by age group, for females**

| <b>Country/Age group</b> | <b>0-4</b> | <b>5-9</b> | <b>10-14</b> | <b>15-19</b> | <b>20-24</b> | <b>25-29</b> | <b>30-34</b> | <b>35-39</b> | <b>40-44</b> | <b>45-49</b> | <b>50-54</b> | <b>55-59</b> | <b>60-64</b> | <b>65-69</b> | <b>70-74</b> | <b>75-79</b> | <b>80-84</b> | <b>85 +</b> | <b>Total</b> |
|--------------------------|------------|------------|--------------|--------------|--------------|--------------|--------------|--------------|--------------|--------------|--------------|--------------|--------------|--------------|--------------|--------------|--------------|-------------|--------------|
| <b>Austria</b>           | 84.9       | 70.5       | 67.0         | 80.4         | 85.5         | 110.9        | 33.9         | 61.2         | 149.3        | 83.8         | 43.3         | 0.0          | 68.8         | 104.3        | 229.6        | 290.8        | 319.5        | 330.1       | <b>106.8</b> |
| <b>Bulgaria</b>          | 196.9      | 46.0       | 88.1         | 235.6        | 130.5        | 88.6         | 39.0         | 95.9         | 42.9         | 83.2         | 79.7         | 0.0          | 103.3        | 93.6         | 102.7        | 82.8         | 150.4        | 52.1        | <b>90.4</b>  |
| <b>Croatia</b>           | 78.9       | 0.0        | 259.6        | 206.2        | 0.0          | 38.8         | 128.2        | 30.5         | 28.1         | 63.0         | 111.0        | 93.2         | 176.6        | 33.5         | 207.2        | 241.9        | 307.5        | 309.9       | <b>115.6</b> |
| <b>Cyprus</b>            | 0.0        | 0.0        | 0.0          | 0.0          | 0.0          | 0.0          | 121.0        | 0.0          | 111.5        | 0.0          | 0.0          | 0.0          | 196.6        | 91.1         | 88.5         | 187.2        | 219.8        | 164.2       | <b>48.1</b>  |
| <b>Denmark</b>           | 111.2      | 43.4       | 244.8        | 178.7        | 0.0          | 63.6         | 56.9         | 92.8         | 19.7         | 92.9         | 30.3         | 128.8        | 69.9         | 55.0         | 60.8         | 162.5        | 178.9        | 111.1       | <b>88.3</b>  |
| <b>Estonia</b>           | 674.5      | 212.8      | 226.8        | 206.6        | 0.0          | 0.0          | 216.3        | 184.8        | 173.1        | 76.1         | 57.8         | 157.4        | 251.4        | 53.6         | 238.5        | 178.0        | 33.7         | 76.0        | <b>165.7</b> |
| <b>Hungary</b>           | 74.3       | 31.2       | 86.4         | 137.1        | 73.6         | 156.7        | 94.8         | 69.5         | 114.3        | 111.6        | 204.6        | 37.4         | 155.1        | 70.9         | 184.6        | 227.3        | 248.8        | 213.7       | <b>118.5</b> |
| <b>Ireland</b>           | 46.0       | 0.0        | 43.0         | 183.5        | 134.5        | 0.0          | 47.8         | 45.0         | 21.5         | 124.5        | 60.6         | 59.2         | 40.0         | 107.8        | 155.4        | 180.6        | 301.9        | 177.5       | <b>73.1</b>  |
| <b>Italy</b>             | 80.4       | 25.9       | 116.3        | 147.6        | 86.5         | 88.6         | 66.6         | 63.9         | 52.8         | 41.2         | 48.3         | 15.3         | 55.2         | 59.2         | 93.8         | 151.9        | 213.0        | 149.9       | <b>78.9</b>  |
| <b>Lithuania</b>         | 112.8      | 0.0        | 92.3         | 139.6        | 165.5        | 108.4        | 105.3        | 395.4        | 237.9        | 234.3        | 270.4        | 141.8        | 263.9        | 209.0        | 83.3         | 238.5        | 179.3        | 184.9       | <b>183.5</b> |
| <b>Luxembourg</b>        | 0.0        | 0.0        | 0.0          | 0.0          | 687.6        | 0.0          | 0.0          | 0.0          | 174.5        | 0.0          | 290.7        | 0.0          | 0.0          | 0.0          | 143.9        | 312.4        | 251.7        | 165.7       | <b>100.9</b> |
| <b>Romania</b>           | 240.3      | 110.4      | 216.6        | 129.1        | 85.9         | 93.3         | 61.8         | 70.2         | 86.8         | 94.5         | 115.2        | 81.7         | 104.8        | 117.8        | 152.8        | 102.7        | 109.9        | 59.3        | <b>110.0</b> |
| <b>Serbia</b>            | 51.7       | 168.6      | 153.1        | 330.4        | 191.9        | 111.8        | 77.6         | 170.9        | 110.1        | 149.4        | 75.3         | 132.1        | 140.3        | 105.7        | 150.2        | 219.4        | 193.9        | 89.6        | <b>143.6</b> |
| <b>Slovakia</b>          | 0.0        | 162.2      | 204.0        | 121.4        | 59.6         | 76.4         | 22.4         | 134.1        | 175.5        | 71.1         | 167.1        | 76.8         | 63.9         | 158.9        | 183.0        | 263.5        | 425.0        | 238.6       | <b>121.0</b> |
| <b>Slovenia</b>          | 0.0        | 0.0        | 0.0          | 134.8        | 0.0          | 81.7         | 0.0          | 111.1        | 55.2         | 0.0          | 77.4         | 0.0          | 71.5         | 34.9         | 188.7        | 152.3        | 315.8        | 248.1       | <b>68.8</b>  |
| <b>United Kingdom</b>    | 54.6       | 0.0        | 88.8         | 91.7         | 42.6         | 38.3         | 38.7         | 67.0         | 47.9         | 68.0         | 54.2         | 16.1         | 34.7         | 79.5         | 104.8        | 147.6        | 209.7        | 177.6       | <b>65.1</b>  |
