# Supplementary material for: Years of life lost due to traumatic brain injury in Europe: A cross-sectional analysis of 16 countries
Source: PubMed Central journal article supplement (PMC5507416; doi:10.1371/journal.pmed.1002331), 2017-07-11

**S1 Figure: Age-standardized injury YLL rates and TBI YLL rates in 16 European countries by sex**

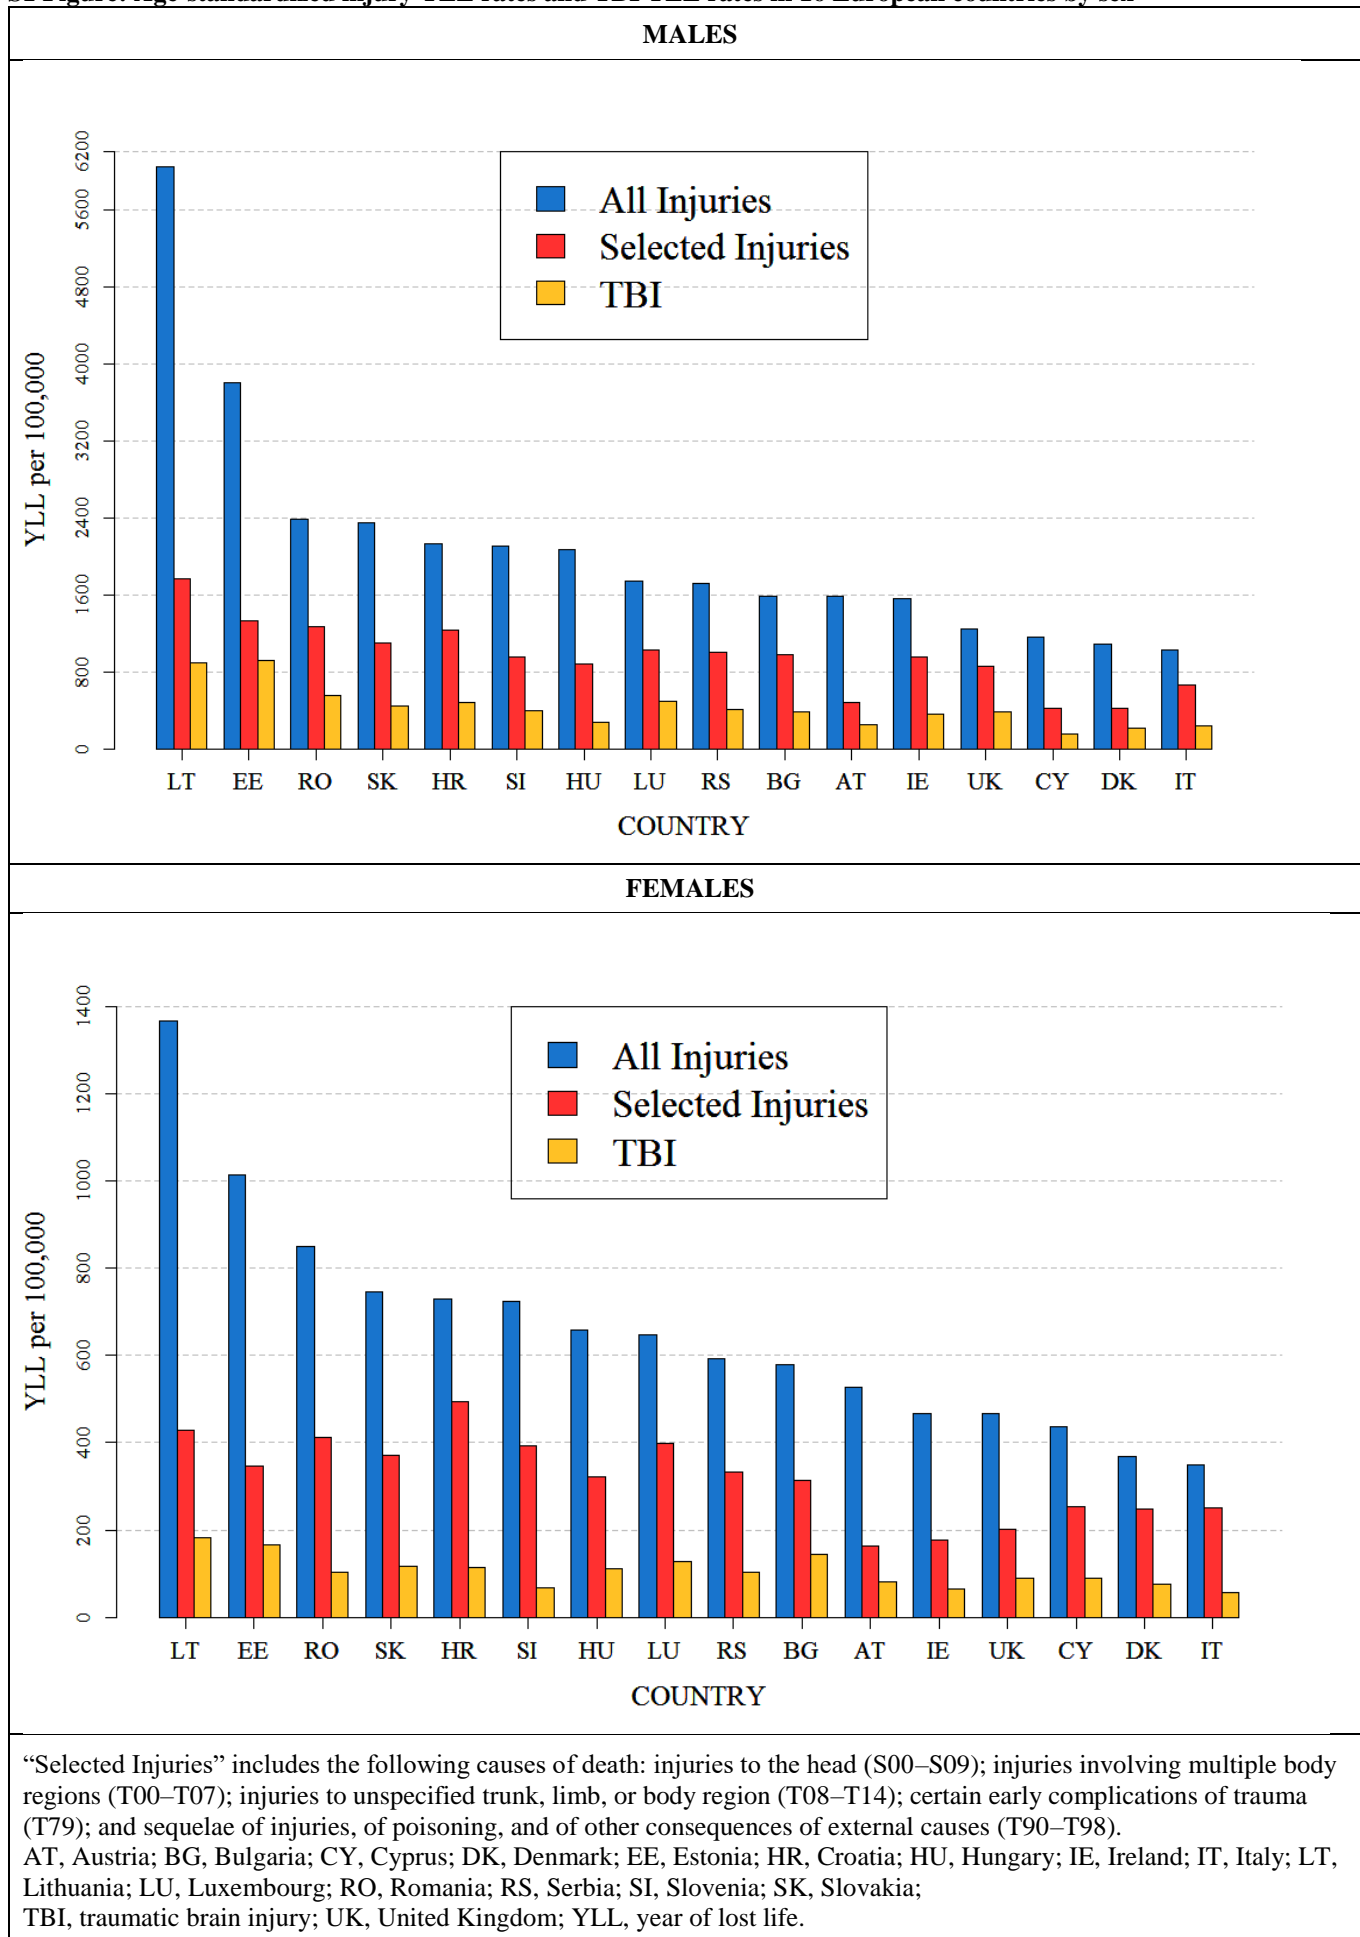

Supplement: pmed.1002331.s002.pdf [file pmed.1002331.s002.pdf]
