# Supplementary material for: Years of life lost due to traumatic brain injury in Europe: A cross-sectional analysis of 16 countries
Source: PubMed Central journal article supplement (PMC5507416; doi:10.1371/journal.pmed.1002331), 2017-07-11
Supplement: pmed.1002331.s004.pdf [file pmed.1002331.s004.pdf]

**S1 Table: Total numbers of injury YLLs in 16 European countries in 2013 by age-group and sex (all causes of death included)**

|                            | Age-group             | 0 - 4        | 5 - 14       | 15 - 34       | 35 - 64        | 65 - 84       | 85+          | TOTAL          |
|----------------------------|-----------------------|--------------|--------------|---------------|----------------|---------------|--------------|----------------|
| <b>Total</b>               | <b>United Kingdom</b> | 6759         | 6572         | 180776        | 254823         | 57262         | 11811        | 518003         |
|                            | <b>Italy</b>          | 5888         | 6602         | 134746        | 172307         | 79807         | 20260        | 419610         |
|                            | <b>Romania</b>        | 12863        | 13016        | 86140         | 159628         | 31465         | 1349         | 304461         |
|                            | <b>Hungary</b>        | 1745         | 1822         | 29138         | 80782          | 23599         | 2888         | 139974         |
|                            | <b>Lithuania</b>      | 1026         | 1398         | 30962         | 64396          | 9244          | 596          | 107622         |
|                            | <b>Austria</b>        | 1003         | 1673         | 25638         | 41943          | 18074         | 3106         | 91437          |
|                            | <b>Serbia</b>         | 1571         | 1985         | 25411         | 41795          | 12655         | 617          | 84034          |
|                            | <b>Slovakia</b>       | 944          | 1884         | 22467         | 44151          | 10240         | 1197         | 80883          |
|                            | <b>Bulgaria</b>       | 2541         | 2398         | 24901         | 38149          | 10389         | 642          | 79020          |
|                            | <b>Croatia</b>        | 858          | 710          | 18257         | 27231          | 11988         | 1745         | 60789          |
|                            | <b>Ireland</b>        | 629          | 896          | 20075         | 21937          | 3656          | 379          | 47572          |
|                            | <b>Denmark</b>        | 1106         | 762          | 10772         | 22557          | 6593          | 1210         | 43000          |
|                            | <b>Estonia</b>        | 1121         | 571          | 10880         | 15870          | 2807          | 149          | 31398          |
|                            | <b>Slovenia</b>       | 78           | 279          | 8029          | 14150          | 5671          | 876          | 29083          |
|                            | <b>Cyprus</b>         | 0            | 217          | 3025          | 2388           | 1011          | 164          | 6805           |
|                            | <b>Luxembourg</b>     | 157          | 130          | 1511          | 3444           | 1051          | 162          | 6455           |
|                            | <b>Total</b>          | <b>38289</b> | <b>40915</b> | <b>632728</b> | <b>1005551</b> | <b>285512</b> | <b>47151</b> | <b>2050146</b> |
| <b>Proportion of total</b> | <b>2%</b>             | <b>2%</b>    | <b>31%</b>   | <b>49%</b>    | <b>14%</b>     | <b>2%</b>     | <b>100%</b>  |                |
| <b>Males</b>               | <b>United Kingdom</b> | 4131         | 3968         | 138746        | 185213         | 30456         | 4471         | 366985         |
|                            | <b>Italy</b>          | 3263         | 4183         | 107107        | 132349         | 45430         | 6815         | 299147         |
|                            | <b>Romania</b>        | 8021         | 8140         | 69307         | 130141         | 20503         | 663          | 236775         |
|                            | <b>Hungary</b>        | 998          | 1087         | 22559         | 61226          | 13400         | 869          | 100139         |
|                            | <b>Lithuania</b>      | 617          | 808          | 25977         | 52100          | 5819          | 184          | 85505          |
|                            | <b>Austria</b>        | 756          | 867          | 19393         | 31516          | 11438         | 1060         | 65030          |
|                            | <b>Slovakia</b>       | 618          | 1296         | 18969         | 35792          | 6343          | 372          | 63390          |
|                            | <b>Bulgaria</b>       | 1064         | 1955         | 20831         | 31395          | 6964          | 325          | 62534          |
|                            | <b>Serbia</b>         | 915          | 878          | 20351         | 31774          | 8248          | 267          | 62433          |
|                            | <b>Croatia</b>        | 530          | 404          | 15249         | 21444          | 6237          | 426          | 44290          |
|                            | <b>Ireland</b>        | 304          | 747          | 15621         | 16720          | 2215          | 130          | 35737          |
|                            | <b>Denmark</b>        | 692          | 394          | 7897          | 16566          | 3882          | 405          | 29836          |
|                            | <b>Estonia</b>        | 462          | 273          | 8897          | 12779          | 1815          | 62           | 24288          |
|                            | <b>Slovenia</b>       | 78           | 203          | 6392          | 11179          | 3254          | 239          | 21345          |
|                            | <b>Cyprus</b>         | 0            | 139          | 2790          | 1813           | 638           | 47           | 5427           |
|                            | <b>Luxembourg</b>     | 77           | 130          | 1005          | 2300           | 625           | 49           | 4186           |
|                            | <b>Total</b>          | <b>22526</b> | <b>25472</b> | <b>501091</b> | <b>774307</b>  | <b>167267</b> | <b>16384</b> | <b>1507047</b> |
| <b>Proportion of total</b> | <b>1%</b>             | <b>2%</b>    | <b>33%</b>   | <b>51%</b>    | <b>11%</b>     | <b>1%</b>     | <b>100%</b>  |                |
| <b>Females</b>             | <b>United Kingdom</b> | 2628         | 2604         | 42030         | 69610          | 26806         | 7340         | 151018         |
|                            | <b>Italy</b>          | 2625         | 2419         | 27639         | 39958          | 34377         | 13445        | 120463         |
|                            | <b>Romania</b>        | 4842         | 4876         | 16833         | 29487          | 10962         | 686          | 67686          |
|                            | <b>Hungary</b>        | 747          | 735          | 6579          | 19556          | 10199         | 2019         | 39835          |
|                            | <b>Austria</b>        | 247          | 806          | 6245          | 10427          | 6636          | 2046         | 26407          |
|                            | <b>Lithuania</b>      | 409          | 590          | 4985          | 12296          | 3425          | 412          | 22117          |
|                            | <b>Serbia</b>         | 656          | 1107         | 5060          | 10021          | 4407          | 350          | 21601          |
|                            | <b>Slovakia</b>       | 326          | 588          | 3498          | 8359           | 3897          | 825          | 17493          |
|                            | <b>Croatia</b>        | 328          | 306          | 3008          | 5787           | 5751          | 1319         | 16499          |
|                            | <b>Bulgaria</b>       | 1477         | 443          | 4070          | 6754           | 3425          | 317          | 16486          |
|                            | <b>Denmark</b>        | 414          | 368          | 2875          | 5991           | 2711          | 805          | 13164          |
|                            | <b>Ireland</b>        | 325          | 149          | 4454          | 5217           | 1441          | 249          | 11835          |
|                            | <b>Slovenia</b>       | 0            | 76           | 1637          | 2971           | 2417          | 637          | 7738           |
|                            | <b>Estonia</b>        | 659          | 298          | 1983          | 3091           | 992           | 87           | 7110           |
|                            | <b>Luxembourg</b>     | 80           | 0            | 506           | 1144           | 426           | 113          | 2269           |
|                            | <b>Cyprus</b>         | 0            | 78           | 235           | 575            | 373           | 117          | 1378           |
|                            | <b>Total</b>          | <b>15763</b> | <b>15443</b> | <b>131637</b> | <b>231244</b>  | <b>118245</b> | <b>30767</b> | <b>543099</b>  |
| <b>Proportion of total</b> | <b>3%</b>             | <b>3%</b>    | <b>24%</b>   | <b>43%</b>    | <b>22%</b>     | <b>6%</b>     | <b>100%</b>  |                |

YLL=Years of Lost Life
