# Supplementary material for: Years of life lost due to traumatic brain injury in Europe: A cross-sectional analysis of 16 countries
Source: PubMed Central journal article supplement (PMC5507416; doi:10.1371/journal.pmed.1002331), 2017-07-11
Supplement: pmed.1002331.s007.pdf [file pmed.1002331.s007.pdf]

**S4 Table. Comparison of pooled age-standardized rates of TBI YLLs per 100,000 persons in 16 European countries in 2013 calculated using the random effects model and the fixed effects model.**

| <b>Model used</b>                | <b>Both sexes</b>      | <b>Males</b>           | <b>Females</b>         |
|----------------------------------|------------------------|------------------------|------------------------|
| <b>Random effects model</b>      | 259.1 (205.8 to 312.3) | 427.5 (290.0 to 564.9) | 105.4 (89.1 to 121.6)  |
| <b>Fixed effects model</b>       | 233,3 (233,1 to 233,5) | 486.2 (485.6 to 486.9) | 96.0 (95.9 to 96.2)    |
| <b>I<sup>2</sup> with 95% CI</b> | 100 % (100 % to 100 %) | 100 % (100 % to 100 %) | 100 % (100 % to 100 %) |

TBI, traumatic brain injury; YLL, year of lost life.
