# Supplementary material for: Years of life lost due to traumatic brain injury in Europe: A cross-sectional analysis of 16 countries
Source: PubMed Central journal article supplement (PMC5507416; doi:10.1371/journal.pmed.1002331), 2017-07-11
Supplement: pmed.1002331.s008.pdf [file pmed.1002331.s008.pdf]

**S5 Table: Numbers of TBI deaths in 16 European countries in 2013 by age-group, country and sex**

|                            | Age-group             | 0 - 4      | 5 - 14     | 15 - 34     | 35 - 64     | 65 - 84     | 85+         | TOTAL        |
|----------------------------|-----------------------|------------|------------|-------------|-------------|-------------|-------------|--------------|
| <b>Total</b>               | <b>Italy</b>          | 22         | 29         | 594         | 1063        | 1819        | 1154        | 4681         |
|                            | <b>United Kingdom</b> | 26         | 18         | 361         | 881         | 1341        | 1131        | 3758         |
|                            | <b>Romania</b>        | 31         | 33         | 276         | 923         | 577         | 87          | 1927         |
|                            | <b>Austria</b>        | 4          | 7          | 77          | 274         | 471         | 282         | 1115         |
|                            | <b>Hungary</b>        | 6          | 5          | 114         | 432         | 391         | 130         | 1078         |
|                            | <b>Serbia</b>         | 4          | 15         | 149         | 342         | 313         | 36          | 859          |
|                            | <b>Slovakia</b>       | 1          | 10         | 78          | 321         | 247         | 61          | 718          |
|                            | <b>Bulgaria</b>       | 11         | 9          | 105         | 286         | 209         | 30          | 650          |
|                            | <b>Lithuania</b>      | 1          | 4          | 72          | 294         | 165         | 29          | 565          |
|                            | <b>Croatia</b>        | 4          | 4          | 65          | 202         | 209         | 67          | 551          |
|                            | <b>Denmark</b>        | 3          | 7          | 49          | 113         | 114         | 58          | 344          |
|                            | <b>Ireland</b>        | 2          | 7          | 54          | 90          | 74          | 35          | 262          |
|                            | <b>Estonia</b>        | 4          | 3          | 39          | 121         | 55          | 8           | 230          |
|                            | <b>Slovenia</b>       | 0          | 0          | 16          | 55          | 82          | 36          | 189          |
|                            | <b>Cyprus</b>         | 0          | 0          | 22          | 20          | 18          | 7           | 67           |
|                            | <b>Luxembourg</b>     | 0          | 1          | 8           | 19          | 17          | 10          | 55           |
|                            | <b>Total</b>          | <b>119</b> | <b>152</b> | <b>2079</b> | <b>5436</b> | <b>6102</b> | <b>3161</b> | <b>17049</b> |
| <b>Proportion of total</b> | <b>1%</b>             | <b>1%</b>  | <b>12%</b> | <b>32%</b>  | <b>36%</b>  | <b>19%</b>  | <b>100%</b> |              |
| <b>Males</b>               | <b>United Kingdom</b> | 13         | 14         | 278         | 684         | 818         | 534         | 2341         |
|                            | <b>Slovenia</b>       | 0          | 0          | 14          | 48          | 56          | 13          | 131          |
|                            | <b>Slovakia</b>       | 1          | 5          | 66          | 284         | 171         | 34          | 561          |
|                            | <b>Serbia</b>         | 3          | 6          | 123         | 286         | 228         | 23          | 669          |
|                            | <b>Romania</b>        | 17         | 17         | 227         | 808         | 421         | 56          | 1546         |
|                            | <b>Luxembourg</b>     | 0          | 1          | 6           | 16          | 12          | 6           | 41           |
|                            | <b>Lithuania</b>      | 0          | 2          | 64          | 245         | 123         | 11          | 445          |
|                            | <b>Italy</b>          | 9          | 20         | 486         | 856         | 1179        | 533         | 3083         |
|                            | <b>Ireland</b>        | 1          | 6          | 46          | 74          | 39          | 14          | 180          |
|                            | <b>Hungary</b>        | 4          | 2          | 92          | 349         | 261         | 56          | 764          |
|                            | <b>Estonia</b>        | 1          | 1          | 37          | 108         | 42          | 3           | 192          |
|                            | <b>Denmark</b>        | 1          | 3          | 36          | 93          | 77          | 26          | 236          |
|                            | <b>Cyprus</b>         | 0          | 0          | 22          | 16          | 12          | 5           | 55           |
|                            | <b>Croatia</b>        | 3          | 2          | 56          | 176         | 142         | 31          | 410          |
|                            | <b>Bulgaria</b>       | 7          | 8          | 88          | 250         | 150         | 22          | 525          |
|                            | <b>Austria</b>        | 2          | 5          | 62          | 234         | 337         | 125         | 765          |
|                            | <b>Total</b>          | <b>62</b>  | <b>92</b>  | <b>1703</b> | <b>4527</b> | <b>4068</b> | <b>1492</b> | <b>11944</b> |
| <b>Proportion of total</b> | <b>1%</b>             | <b>1%</b>  | <b>14%</b> | <b>38%</b>  | <b>34%</b>  | <b>12%</b>  | <b>100%</b> |              |
| <b>Females</b>             | <b>Italy</b>          | 13         | 9          | 108         | 207         | 640         | 621         | 1598         |
|                            | <b>United Kingdom</b> | 13         | 4          | 83          | 197         | 523         | 597         | 1417         |
|                            | <b>Romania</b>        | 14         | 16         | 49          | 115         | 156         | 31          | 381          |
|                            | <b>Austria</b>        | 2          | 2          | 15          | 40          | 134         | 157         | 350          |
|                            | <b>Hungary</b>        | 2          | 3          | 22          | 83          | 130         | 74          | 314          |
|                            | <b>Serbia</b>         | 1          | 9          | 26          | 56          | 85          | 13          | 190          |
|                            | <b>Slovakia</b>       | 0          | 5          | 12          | 37          | 76          | 27          | 157          |
|                            | <b>Croatia</b>        | 1          | 2          | 9           | 26          | 67          | 36          | 141          |
|                            | <b>Bulgaria</b>       | 4          | 1          | 17          | 36          | 59          | 8           | 125          |
|                            | <b>Lithuania</b>      | 1          | 2          | 8           | 49          | 42          | 18          | 120          |
|                            | <b>Denmark</b>        | 2          | 4          | 13          | 20          | 37          | 32          | 108          |
|                            | <b>Ireland</b>        | 1          | 1          | 8           | 16          | 35          | 21          | 82           |
|                            | <b>Slovenia</b>       | 0          | 0          | 2           | 7           | 26          | 23          | 58           |
|                            | <b>Estonia</b>        | 3          | 2          | 2           | 13          | 13          | 5           | 38           |
|                            | <b>Luxembourg</b>     | 0          | 0          | 2           | 3           | 5           | 4           | 14           |
|                            | <b>Cyprus</b>         | 0          | 0          | 0           | 4           | 6           | 2           | 12           |
|                            | <b>Total</b>          | <b>57</b>  | <b>60</b>  | <b>376</b>  | <b>909</b>  | <b>2034</b> | <b>1669</b> | <b>5105</b>  |
| <b>Proportion of total</b> | <b>1%</b>             | <b>1%</b>  | <b>7%</b>  | <b>18%</b>  | <b>40%</b>  | <b>33%</b>  | <b>100%</b> |              |

TBI=Traumatic Brain Injury
