# Supplementary material for: Years of life lost due to traumatic brain injury in Europe: A cross-sectional analysis of 16 countries
Source: PubMed Central journal article supplement (PMC5507416; doi:10.1371/journal.pmed.1002331), 2017-07-11
Supplement: pmed.1002331.s009.pdf [file pmed.1002331.s009.pdf]

S6 Table: Crude and age-standardized TBI death rates in 16 European countries in 2013 by age and sex

|                | Age-group             | 0 - 4 | 5 - 14 | 15 - 34 | 35 - 64 | 65 - 84 | 85+   | crude rate | Age-adjusted rate (95% CI) |
|----------------|-----------------------|-------|--------|---------|---------|---------|-------|------------|----------------------------|
| <b>Total</b>   | <b>Lithuania</b>      | 0.7   | 1.4    | 9.4     | 24.2    | 34.1    | 49.3  | 19.1       | 19.3 (17.7 - 20.9)         |
|                | <b>Estonia</b>        | 5.3   | 2.3    | 11.5    | 22.8    | 25.8    | 30.2  | 17.5       | 17.6 (15.4 - 20.1)         |
|                | <b>Slovakia</b>       | 0.3   | 1.9    | 5.0     | 14.0    | 37.7    | 92.2  | 13.3       | 15.8 (14.6 - 17.1)         |
|                | <b>Croatia</b>        | 1.9   | 1.0    | 6.1     | 11.4    | 29.4    | 98.3  | 13.0       | 13.7 (12.6 - 15)           |
|                | <b>Austria</b>        | 1.0   | 0.9    | 3.6     | 7.6     | 35.3    | 136.7 | 13.1       | 13.5 (12.7 - 14.3)         |
|                | <b>Serbia</b>         | 1.2   | 2.2    | 8.4     | 11.1    | 26.4    | 39.1  | 12.0       | 12.3 (11.5 - 13.2)         |
|                | <b>Luxembourg</b>     | 0.0   | 1.6    | 5.5     | 8.3     | 25.4    | 106.7 | 10.1       | 11.8 (8.9 - 15.5)          |
|                | <b>Hungary</b>        | 1.3   | 0.5    | 4.6     | 10.2    | 25.3    | 75.5  | 10.9       | 11.5 (10.8 - 12.2)         |
|                | <b>Romania</b>        | 3.2   | 1.5    | 5.4     | 10.9    | 19.3    | 29.6  | 9.6        | 10.1 (9.6 - 10.5)          |
|                | <b>Slovenia</b>       | 0.0   | 0.0    | 3.2     | 6.1     | 25.9    | 90.1  | 9.2        | 9.9 (8.5 - 11.4)           |
|                | <b>Cyprus</b>         | 3.2   | 1.4    | 6.0     | 9.2     | 16.2    | 25.2  | 8.9        | 8.9 (8.2 - 9.6)            |
|                | <b>Bulgaria</b>       | 0.0   | 0.0    | 8.1     | 6.0     | 17.0    | 63.2  | 7.8        | 8.9 (6.8 - 11.5)           |
|                | <b>Ireland</b>        | 0.8   | 0.5    | 4.6     | 4.1     | 16.5    | 63.2  | 7.8        | 7.2 (7 - 7.5)              |
|                | <b>Italy</b>          | 0.5   | 1.1    | 4.4     | 5.0     | 14.5    | 56.0  | 5.7        | 7.1 (6.2 - 8.1)            |
|                | <b>Denmark</b>        | 1.0   | 1.1    | 3.6     | 5.0     | 12.7    | 50.4  | 6.1        | 6.5 (5.8 - 7.2)            |
|                | <b>United Kingdom</b> | 0.6   | 0.2    | 2.1     | 3.5     | 13.9    | 77.2  | 5.9        | 6.3 (6.1 - 6.5)            |
|                | <b>Pooled</b>         |       |        |         |         |         |       |            | <b>11.3 (9.5 - 13.1)</b>   |
| <b>Males</b>   | <b>Lithuania</b>      | 0.0   | 1.4    | 16.3    | 43.3    | 72.8    | 82.0  | 32.7       | 36.0 (32.6 - 39.8)         |
|                | <b>Estonia</b>        | 2.6   | 1.5    | 21.1    | 42.6    | 56.2    | 55.3  | 31.2       | 33.5 (28.8 - 39.2)         |
|                | <b>Slovakia</b>       | 0.7   | 1.8    | 8.2     | 25.0    | 66.8    | 184.9 | 21.3       | 28.3 (25.7 - 31.2)         |
|                | <b>Croatia</b>        | 2.8   | 0.9    | 10.3    | 20.1    | 49.4    | 170.9 | 20.0       | 23.5 (21.1 - 26.2)         |
|                | <b>Austria</b>        | 1.0   | 1.2    | 5.7     | 13.2    | 56.7    | 214.8 | 18.5       | 21.9 (20.3 - 23.6)         |
|                | <b>Serbia</b>         | 1.8   | 1.7    | 13.5    | 19.0    | 44.9    | 72.4  | 19.2       | 20.6 (19.0 - 22.4)         |
|                | <b>Luxembourg</b>     | 0.0   | 3.2    | 8.1     | 13.6    | 39.2    | 219.1 | 15.1       | 20.0 (13.9 - 28.3)         |
|                | <b>Hungary</b>        | 1.7   | 0.4    | 7.2     | 16.9    | 44.1    | 123.3 | 16.2       | 19.3 (17.9 - 20.8)         |
|                | <b>Romania</b>        | 3.4   | 1.6    | 8.6     | 19.2    | 34.5    | 56.9  | 15.9       | 17.5 (16.6 - 18.4)         |
|                | <b>Slovenia</b>       | 0.0   | 0.0    | 5.3     | 10.4    | 41.7    | 133.7 | 12.8       | 15.9 (13.1 - 19.3)         |
|                | <b>Bulgaria</b>       | 4.0   | 2.4    | 9.6     | 16.2    | 28.3    | 54.6  | 14.9       | 15.5 (14.2 - 17.0)         |
|                | <b>Cyprus</b>         | 0.0   | 0.0    | 16.3    | 10.1    | 24.4    | 114.3 | 13.1       | 15.0 (11.0 - 20.3)         |
|                | <b>Italy</b>          | 0.6   | 0.7    | 7.4     | 6.7     | 24.0    | 95.0  | 10.6       | 11.0 (10.7 - 11.4)         |
|                | <b>Ireland</b>        | 0.5   | 1.8    | 7.5     | 8.3     | 16.0    | 69.3  | 7.9        | 9.9 (8.4 - 11.6)           |
|                | <b>Denmark</b>        | 0.6   | 0.9    | 5.2     | 8.2     | 18.2    | 70.5  | 8.5        | 9.6 (8.3 - 10.9)           |
|                | <b>United Kingdom</b> | 0.6   | 0.4    | 3.3     | 5.6     | 18.2    | 108.3 | 7.4        | 8.9 (8.6 - 9.3)            |
|                | <b>Pooled</b>         |       |        |         |         |         |       |            | <b>19.2 (15.4 - 22.9)</b>  |
| <b>Females</b> | <b>Austria</b>        | 1.0   | 0.5    | 1.4     | 2.2     | 18.1    | 106.0 | 8.1        | 7.1 (6.3 - 7.9)            |
|                | <b>Lithuania</b>      | 1.4   | 1.5    | 2.1     | 7.6     | 13.4    | 39.6  | 7.5        | 7.1 (5.8 - 8.5)            |
|                | <b>Slovakia</b>       | 0.0   | 1.9    | 1.6     | 3.2     | 19.0    | 56.5  | 5.7        | 6.5 (5.5 - 7.7)            |
|                | <b>Croatia</b>        | 1.0   | 1.0    | 1.7     | 2.9     | 15.9    | 72.0  | 6.4        | 6.2 (5.2 - 7.4)            |
|                | <b>Hungary</b>        | 0.9   | 0.6    | 1.8     | 3.8     | 13.7    | 58.4  | 6.1        | 5.9 (5.2 - 6.6)            |
|                | <b>Luxembourg</b>     | 0.0   | 0.0    | 2.8     | 2.7     | 13.8    | 60.3  | 5.2        | 5.6 (3.0 - 9.5)            |
|                | <b>Slovenia</b>       | 0.0   | 0.0    | 0.8     | 1.6     | 14.3    | 76.1  | 5.6        | 5.2 (3.9 - 6.7)            |
|                | <b>Serbia</b>         | 0.6   | 2.7    | 3.0     | 3.6     | 12.6    | 21.6  | 5.2        | 5.2 (4.4 - 6.0)            |
|                | <b>Estonia</b>        | 8.2   | 3.1    | 1.2     | 4.7     | 9.4     | 23.8  | 5.4        | 5.1 (3.6 - 7.1)            |
|                | <b>Ireland</b>        | 0.6   | 0.3    | 1.3     | 1.8     | 13.2    | 49.7  | 3.5        | 4.6 (3.6 - 5.7)            |
|                | <b>United Kingdom</b> | 0.7   | 0.1    | 1.0     | 1.6     | 10.1    | 61.4  | 4.3        | 4.2 (4.0 - 4.4)            |
|                | <b>Italy</b>          | 1.0   | 0.3    | 1.7     | 1.6     | 10.5    | 49.1  | 5.1        | 4.1 (3.9 - 4.4)            |
|                | <b>Romania</b>        | 2.9   | 1.5    | 2.0     | 2.7     | 8.8     | 15.9  | 3.7        | 3.8 (3.4 - 4.2)            |
|                | <b>Denmark</b>        | 1.3   | 1.2    | 1.9     | 1.8     | 7.8     | 40.9  | 3.8        | 3.7 (3.1 - 4.5)            |
|                | <b>Cyprus</b>         | 0.0   | 0.0    | 0.0     | 2.3     | 10.6    | 29.8  | 2.7        | 3.5 (1.8 - 6.2)            |
|                | <b>Bulgaria</b>       | 2.4   | 0.3    | 2.0     | 2.3     | 7.8     | 10.2  | 3.4        | 3.1 (2.6 - 3.8)            |
|                | <b>Pooled</b>         |       |        |         |         |         |       |            | <b>5.1 (4.4 - 5.7)</b>     |

Meta-analysis heterogeneity:  $I^2$  for total= 99.2% (95%CI: 99.1% to 99.4%);  $I^2$  for males= 99.7% (95%CI: 99.7% to 99.7%);  $I^2$  for females= 96.9% (95%CI: 96.0% to 97.6%);

TBI=Traumatic Brain Injury
