# Supplementary material for: Years of life lost due to traumatic brain injury in Europe: A cross-sectional analysis of 16 countries
Source: PubMed Central journal article supplement (PMC5507416; doi:10.1371/journal.pmed.1002331), 2017-07-11
Supplement: pmed.1002331.s010.pdf [file pmed.1002331.s010.pdf]

**S7 Table: Male to female rate ratios of TBI death rates in 16 European countries in 2013**

|                       | <b>RR</b>                  |
|-----------------------|----------------------------|
| <b>Austria</b>        | 2.29 (2.02 to 2.60)        |
| <b>Bulgaria</b>       | 4.43 (3.66 to 5.40)        |
| <b>Croatia</b>        | 3.12 (2.58 to 3.78)        |
| <b>Cyprus</b>         | 4.79 (2.65 to 9.41)        |
| <b>Denmark</b>        | 2.22 (1.77 to 2.80)        |
| <b>Estonia</b>        | 5.75 (4.11 to 8.26)        |
| <b>Hungary</b>        | 2.68 (2.35 to 3.06)        |
| <b>Ireland</b>        | 2.24 (1.73 to 2.92)        |
| <b>Italy</b>          | 2.05 (1.93 to 2.18)        |
| <b>Lithuania</b>      | 4.34 (3.56 to 5.33)        |
| <b>Luxembourg</b>     | 2.90 (1.62 to 5.54)        |
| <b>Romania</b>        | 4.25 (3.81 to 4.77)        |
| <b>Serbia</b>         | 3.71 (3.16 to 4.37)        |
| <b>Slovakia</b>       | 3.76 (3.16 to 4.50)        |
| <b>Slovenia</b>       | 2.30 (1.70 to 3.15)        |
| <b>United Kingdom</b> | 1.71 (1.60 to 1.82)        |
| <b>Total</b>          | <b>2.46 (2.38 to 2.54)</b> |

TBI=Traumatic Brain Injury
