# Supplementary material for: Years of life lost due to traumatic brain injury in Europe: A cross-sectional analysis of 16 countries
Source: PubMed Central journal article supplement (PMC5507416; doi:10.1371/journal.pmed.1002331), 2017-07-11
Supplement: pmed.1002331.s011.pdf [file pmed.1002331.s011.pdf]

**S8 Table. Rate ratios of TBI YLL rates per 100,000 persons in 16 European countries in 2013 by age and sex.**

| Age-group      | 0 - 4                      | 5 - 14                     | 15 - 34                    | 35 - 64  | 65 - 84                    | 85+                        |
|----------------|----------------------------|----------------------------|----------------------------|----------|----------------------------|----------------------------|
| Austria        | 0.36 (0.32 to 0.40)        | 0.27 (0.24 to 0.29)        | 0.90 (0.87 to 0.93)        | 1        | 1.85 (1.79 to 1.92)        | 1.95 (1.82 to 2.09)        |
| Bulgaria       | 0.92 (0.86 to 0.98)        | 0.35 (0.32 to 0.38)        | 1.18 (1.14 to 1.22)        | 1        | 0.75 (0.71 to 0.78)        | 0.39 (0.32 to 0.46)        |
| Croatia        | 0.45 (0.40 to 0.51)        | 0.21 (0.18 to 0.23)        | 1.04 (1.00 to 1.09)        | 1        | 1.04 (1.00 to 1.10)        | 1.24 (1.09 to 1.40)        |
| Cyprus         | -                          | -                          | 2.62 (2.38 to 2.90)        | 1        | 1.21 (1.04 to 1.42)        | 0.96 (0.58 to 1.49)        |
| Denmark        | 0.52 (0.45 to 0.59)        | 0.49 (0.44 to 0.53)        | 1.32 (1.26 to 1.39)        | 1        | 1.01 (0.95 to 1.08)        | 0.86 (0.73 to 1.01)        |
| Estonia        | 0.64 (0.57 to 0.72)        | 0.24 (0.21 to 0.28)        | 0.90 (0.85 to 0.95)        | 1        | 0.52 (0.48 to 0.56)        | 0.17 (0.12 to 0.24)        |
| Hungary        | 0.36 (0.33 to 0.39)        | 0.13 (0.11 to 0.14)        | 0.85 (0.83 to 0.88)        | 1        | 1.06 (1.03 to 1.10)        | 0.96 (0.88 to 1.05)        |
| Ireland        | 0.29 (0.24 to 0.34)        | 0.50 (0.46 to 0.55)        | 1.55 (1.47 to 1.63)        | 1        | 1.20 (1.11 to 1.29)        | 1.20 (0.98 to 1.44)        |
| Italy          | 0.51 (0.49 to 0.53)        | 0.28 (0.27 to 0.29)        | 1.98 (1.95 to 2.01)        | 1        | 1.44 (1.42 to 1.47)        | 1.42 (1.37 to 1.47)        |
| Lithuania      | 0.08 (0.06 to 0.09)        | 0.14 (0.13 to 0.16)        | 0.69 (0.66 to 0.72)        | 1        | 0.59 (0.56 to 0.62)        | 0.29 (0.24 to 0.34)        |
| Luxembourg     | -                          | 0.42 (0.32 to 0.54)        | 1.15 (1.01 to 1.30)        | 1        | 1.19 (1.01 to 1.39)        | 1.14 (0.75 to 1.64)        |
| Romania        | 0.77 (0.74 to 0.80)        | 0.34 (0.33 to 0.35)        | 0.91 (0.90 to 0.93)        | 1        | 0.76 (0.74 to 0.78)        | 0.35 (0.31 to 0.39)        |
| Serbia         | 0.30 (0.26 to 0.33)        | 0.48 (0.45 to 0.51)        | 1.41 (1.37 to 1.45)        | 1        | 0.98 (0.94 to 1.02)        | 0.43 (0.36 to 0.52)        |
| Slovakia       | 0.07 (0.05 to 0.08)        | 0.34 (0.31 to 0.36)        | 0.67 (0.65 to 0.70)        | 1        | 1.18 (1.13 to 1.23)        | 0.88 (0.77 to 1.00)        |
| Slovenia       | -                          | -                          | 0.99 (0.91 to 1.08)        | 1        | 1.73 (1.59 to 1.87)        | 2.03 (1.69 to 2.41)        |
| United Kingdom | 0.47 (0.45 to 0.49)        | 0.16 (0.15 to 0.17)        | 1.08 (1.06 to 1.10)        | 1        | 1.43 (1.41 to 1.46)        | 1.99 (1.92 to 2.06)        |
| <b>Total</b>   | <b>0.45 (0.45 to 0.46)</b> | <b>0.26 (0.26 to 0.27)</b> | <b>1.18 (1.17 to 1.19)</b> | <b>1</b> | <b>1.13 (1.12 to 1.14)</b> | <b>1.07 (1.05 to 1.10)</b> |
| Austria        | 0.20 (0.17 to 0.24)        | 0.22 (0.20 to 0.25)        | 0.85 (0.81 to 0.88)        | 1        | 1.74 (1.67 to 1.81)        | 1.84 (1.66 to 2.04)        |
| Bulgaria       | 0.63 (0.58 to 0.69)        | 0.34 (0.31 to 0.37)        | 1.08 (1.04 to 1.12)        | 1        | 0.73 (0.69 to 0.77)        | 0.44 (0.35 to 0.55)        |
| Croatia        | 0.37 (0.33 to 0.43)        | 0.11 (0.09 to 0.13)        | 0.99 (0.94 to 1.03)        | 1        | 0.99 (0.93 to 1.05)        | 1.14 (0.94 to 1.36)        |
| Cyprus         | -                          | -                          | 3.23 (2.90 to 3.61)        | 1        | 1.07 (0.88 to 1.28)        | 0.59 (0.25 to 1.15)        |
| Denmark        | 0.20 (0.16 to 0.24)        | 0.23 (0.20 to 0.27)        | 1.14 (1.08 to 1.21)        | 1        | 0.90 (0.83 to 0.97)        | 0.71 (0.55 to 0.90)        |
| Estonia        | 0.16 (0.13 to 0.20)        | 0.08 (0.06 to 0.10)        | 0.89 (0.84 to 0.95)        | 1        | 0.61 (0.56 to 0.67)        | 0.21 (0.12 to 0.34)        |
| Hungary        | 0.28 (0.25 to 0.31)        | 0.06 (0.05 to 0.07)        | 0.82 (0.79 to 0.85)        | 1        | 1.13 (1.09 to 1.18)        | 0.97 (0.85 to 1.12)        |
| Ireland        | 0.17 (0.13 to 0.21)        | 0.52 (0.47 to 0.58)        | 1.63 (1.54 to 1.73)        | 1        | 0.81 (0.74 to 0.90)        | 0.78 (0.55 to 1.05)        |
| Italy          | 0.24 (0.23 to 0.26)        | 0.23 (0.22 to 0.24)        | 1.96 (1.93 to 2.00)        | 1        | 1.28 (1.25 to 1.30)        | 1.22 (1.16 to 1.29)        |
| Lithuania      | -                          | 0.07 (0.06 to 0.09)        | 0.67 (0.65 to 0.70)        | 1        | 0.70 (0.67 to 0.74)        | 0.22 (0.16 to 0.30)        |
| Luxembourg     | -                          | 0.49 (0.38 to 0.64)        | 1.01 (0.88 to 1.17)        | 1        | 1.12 (0.93 to 1.35)        | 1.41 (0.82 to 2.24)        |
| Romania        | 0.45 (0.43 to 0.48)        | 0.19 (0.18 to 0.20)        | 0.82 (0.80 to 0.84)        | 1        | 0.75 (0.73 to 0.77)        | 0.39 (0.34 to 0.44)        |
| Serbia         | 0.25 (0.22 to 0.29)        | 0.21 (0.19 to 0.24)        | 1.34 (1.30 to 1.39)        | 1        | 0.97 (0.93 to 1.01)        | 0.44 (0.34 to 0.55)        |
| Slovakia       | 0.08 (0.06 to 0.09)        | 0.18 (0.16 to 0.20)        | 0.62 (0.60 to 0.65)        | 1        | 1.20 (1.15 to 1.26)        | 0.92 (0.76 to 1.10)        |
| Slovenia       | -                          | -                          | 0.99 (0.90 to 1.08)        | 1        | 1.66 (1.51 to 1.83)        | 2.24 (1.71 to 2.87)        |
| United Kingdom | 0.29 (0.27 to 0.31)        | 0.16 (0.15 to 0.17)        | 1.06 (1.04 to 1.08)        | 1        | 1.16 (1.14 to 1.19)        | 1.76 (1.67 to 1.86)        |
| <b>Total</b>   | <b>0.27 (0.26 to 0.28)</b> | <b>0.18 (0.18 to 0.19)</b> | <b>1.13 (1.12 to 1.14)</b> | <b>1</b> | <b>1.00 (0.99 to 1.02)</b> | <b>0.93 (0.90 to 0.96)</b> |
| Austria        | 1.13 (0.96 to 1.33)        | 0.46 (0.39 to 0.55)        | 1.09 (1.00 to 1.18)        | 1        | 2.95 (2.75 to 3.17)        | 4.41 (3.97 to 4.89)        |
| Bulgaria       | 2.67 (2.36 to 3.02)        | 0.32 (0.25 to 0.40)        | 1.59 (1.46 to 1.74)        | 1        | 1.40 (1.27 to 1.53)        | 0.71 (0.51 to 0.95)        |
| Croatia        | 0.89 (0.70 to 1.11)        | 0.82 (0.69 to 0.98)        | 1.23 (1.10 to 1.37)        | 1        | 2.10 (1.90 to 2.32)        | 3.48 (2.92 to 4.13)        |
| Cyprus         | -                          | -                          | -                          | 1        | 1.77 (1.32 to 2.35)        | 2.27 (1.15 to 4.02)        |
| Denmark        | 1.86 (1.57 to 2.20)        | 1.54 (1.34 to 1.76)        | 2.01 (1.82 to 2.23)        | 1        | 1.61 (1.43 to 1.82)        | 1.86 (1.48 to 2.31)        |
| Estonia        | 4.29 (3.66 to 5.01)        | 1.47 (1.22 to 1.77)        | 0.50 (0.41 to 0.61)        | 1        | 0.85 (0.72 to 1.01)        | 0.49 (0.28 to 0.78)        |
| Hungary        | 0.62 (0.53 to 0.73)        | 0.40 (0.35 to 0.46)        | 0.87 (0.81 to 0.93)        | 1        | 1.41 (1.33 to 1.50)        | 1.79 (1.58 to 2.03)        |
| Ireland        | 0.76 (0.60 to 0.95)        | 0.40 (0.31 to 0.50)        | 1.26 (1.12 to 1.43)        | 1        | 2.76 (2.43 to 3.13)        | 2.94 (2.27 to 3.71)        |
| Italy          | 1.51 (1.41 to 1.61)        | 0.45 (0.42 to 0.49)        | 1.88 (1.82 to 1.94)        | 1        | 2.28 (2.20 to 2.35)        | 2.81 (2.67 to 2.95)        |
| Lithuania      | 0.46 (0.37 to 0.57)        | 0.45 (0.38 to 0.53)        | 0.51 (0.46 to 0.56)        | 1        | 0.71 (0.65 to 0.78)        | 0.76 (0.60 to 0.93)        |
| Luxembourg     | -                          | -                          | 1.88 (1.43 to 2.49)        | 1        | 1.93 (1.39 to 2.68)        | 2.03 (1.02 to 3.62)        |
| Romania        | 2.77 (2.59 to 2.96)        | 1.32 (1.23 to 1.40)        | 1.37 (1.30 to 1.44)        | 1        | 1.41 (1.34 to 1.49)        | 0.68 (0.57 to 0.82)        |
| Serbia         | 0.44 (0.35 to 0.55)        | 1.67 (1.53 to 1.83)        | 1.51 (1.41 to 1.61)        | 1        | 1.38 (1.28 to 1.48)        | 0.77 (0.58 to 0.99)        |
| Slovakia       | -                          | 1.32 (1.18 to 1.48)        | 0.89 (0.81 to 0.97)        | 1        | 2.19 (2.01 to 2.38)        | 2.25 (1.85 to 2.71)        |
| Slovenia       | -                          | -                          | 0.94 (0.75 to 1.17)        | 1        | 3.10 (2.61 to 3.69)        | 4.77 (3.65 to 6.16)        |
| United Kingdom | 1.02 (0.96 to 1.09)        | 0.16 (0.14 to 0.18)        | 1.12 (1.08 to 1.16)        | 1        | 2.32 (2.24 to 2.40)        | 3.33 (3.15 to 3.51)        |
| <b>Total</b>   | <b>1.26 (1.22 to 1.30)</b> | <b>0.61 (0.59 to 0.63)</b> | <b>1.29 (1.26 to 1.31)</b> | <b>1</b> | <b>1.92 (1.89 to 1.95)</b> | <b>2.34 (2.27 to 2.41)</b> |

The age group 35–64 years (rate ratio “1”) was used as the reference category when calculating rate ratios.

TBI, traumatic brain injury; YLL, year of lost life.
