# Supplementary material for: Years of life lost due to traumatic brain injury in Europe: A cross-sectional analysis of 16 countries
Source: PubMed Central journal article supplement (PMC5507416; doi:10.1371/journal.pmed.1002331), 2017-07-11
Supplement: pmed.1002331.s012.pdf [file pmed.1002331.s012.pdf]

**S9 Table: Male to female rate ratios of TBI YLL rates in 2013 by country**

|                       | <b>RR</b>                  |
|-----------------------|----------------------------|
| <b>Austria</b>        | 3.25 (3.14 to 3.36)        |
| <b>Bulgaria</b>       | 4.67 (4.50 to 4.85)        |
| <b>Croatia</b>        | 4.19 (4.01 to 4.37)        |
| <b>Cyprus</b>         | 9.01 (7.83 to 10.41)       |
| <b>Denmark</b>        | 2.44 (2.33 to 2.56)        |
| <b>Estonia</b>        | 5.66 (5.31 to 6.03)        |
| <b>Hungary</b>        | 3.30 (3.21 to 3.40)        |
| <b>Ireland</b>        | 3.36 (3.18 to 3.55)        |
| <b>Italy</b>          | 2.95 (2.90 to 2.99)        |
| <b>Lithuania</b>      | 4.91 (4.72 to 5.11)        |
| <b>Luxembourg</b>     | 3.76 (3.30 to 4.30)        |
| <b>Romania</b>        | 4.07 (3.98 to 4.15)        |
| <b>Serbia</b>         | 3.52 (3.41 to 3.63)        |
| <b>Slovakia</b>       | 4.36 (4.20 to 4.53)        |
| <b>Slovenia</b>       | 3.79 (3.50 to 4.12)        |
| <b>United Kingdom</b> | 2.29 (2.26 to 2.33)        |
| <b>Total</b>          | <b>3.24 (3.22 to 3.27)</b> |

TBI=Traumatic Brain Injury, YLL=Years of Lost Life
