# Supplementary material for: Years of life lost due to traumatic brain injury in Europe: A cross-sectional analysis of 16 countries
Source: PubMed Central journal article supplement (PMC5507416; doi:10.1371/journal.pmed.1002331), 2017-07-11
Supplement: pmed.1002331.s013.pdf [file pmed.1002331.s013.pdf]

**S10 Table. Total numbers of injury YLLs in 16 European countries in 2013 by age group and sex.**

|                | Age-group                  | 0 - 4        | 5 - 14       | 15 - 34       | 35 - 64       | 65 - 84       | 85+          | TOTAL         |
|----------------|----------------------------|--------------|--------------|---------------|---------------|---------------|--------------|---------------|
| <b>Total</b>   | Italy                      | 3151         | 3913         | 83450         | 101959        | 63758         | 18850        | 275081        |
|                | United Kingdom             | 2835         | 2949         | 62746         | 70060         | 37546         | 10354        | 186490        |
|                | Romania                    | 4299         | 6566         | 45434         | 69166         | 16678         | 697          | 142840        |
|                | Hungary                    | 628          | 911          | 14694         | 31608         | 13866         | 2359         | 64066         |
|                | Austria                    | 387          | 967          | 15463         | 23207         | 11768         | 2536         | 54328         |
|                | Serbia                     | 475          | 1571         | 16490         | 22196         | 7457          | 381          | 48570         |
|                | Bulgaria                   | 1340         | 1158         | 16088         | 21876         | 5561          | 393          | 46416         |
|                | Slovakia                   | 155          | 1125         | 12576         | 20545         | 7401          | 1085         | 42887         |
|                | Croatia                    | 542          | 644          | 11334         | 13487         | 8535          | 1649         | 36191         |
|                | Lithuania                  | 238          | 650          | 8786          | 17614         | 3955          | 351          | 31594         |
|                | Denmark                    | 321          | 558          | 4762          | 6632          | 3824          | 1044         | 17141         |
|                | Ireland                    | 396          | 489          | 5319          | 5142          | 2149          | 315          | 13810         |
|                | Slovenia                   | 0            | 279          | 3499          | 5082          | 3261          | 770          | 12891         |
|                | Estonia                    | 323          | 291          | 3390          | 5420          | 1232          | 64           | 10720         |
|                | Cyprus                     | 0            | 139          | 2151          | 1442          | 837           | 143          | 4712          |
|                | Luxembourg                 | 77           | 130          | 981           | 1792          | 577           | 126          | 3683          |
|                | <b>Total</b>               | <b>15167</b> | <b>22340</b> | <b>307163</b> | <b>417228</b> | <b>188405</b> | <b>41117</b> | <b>991420</b> |
|                | <b>Proportion of total</b> | <b>2%</b>    | <b>2%</b>    | <b>31%</b>    | <b>42%</b>    | <b>19%</b>    | <b>4%</b>    | <b>100%</b>   |
| <b>Males</b>   | Italy                      | 1518         | 2670         | 67204         | 78549         | 35233         | 6153         | 191327        |
|                | United Kingdom             | 1519         | 1914         | 48867         | 52870         | 19854         | 3821         | 128845        |
|                | Romania                    | 2660         | 3743         | 35288         | 56938         | 10954         | 354          | 109937        |
|                | Hungary                    | 462          | 612          | 11198         | 24096         | 7221          | 664          | 44253         |
|                | Austria                    | 223          | 534          | 11685         | 18414         | 7705          | 828          | 39389         |
|                | Serbia                     | 227          | 608          | 13378         | 17767         | 4882          | 141          | 37003         |
|                | Bulgaria                   | 607          | 935          | 13442         | 17831         | 3802          | 204          | 36821         |
|                | Slovakia                   | 155          | 609          | 10198         | 16762         | 4334          | 309          | 32367         |
|                | Croatia                    | 378          | 338          | 9245          | 10521         | 4163          | 383          | 25028         |
|                | Lithuania                  | 75           | 271          | 7620          | 14136         | 2424          | 106          | 24632         |
|                | Denmark                    | 154          | 260          | 3465          | 5061          | 2153          | 350          | 11443         |
|                | Ireland                    | 151          | 414          | 4413          | 4046          | 1281          | 95           | 10400         |
|                | Slovenia                   | 0            | 203          | 2534          | 3900          | 1864          | 185          | 8686          |
|                | Estonia                    | 77           | 65           | 2740          | 4609          | 773           | 34           | 8298          |
|                | Cyprus                     | 0            | 139          | 1971          | 1095          | 503           | 41           | 3749          |
|                | Luxembourg                 | 77           | 130          | 582           | 1391          | 363           | 36           | 2579          |
|                | <b>Total</b>               | <b>8283</b>  | <b>13445</b> | <b>243830</b> | <b>327986</b> | <b>107509</b> | <b>13704</b> | <b>714757</b> |
|                | <b>Proportion of total</b> | <b>1%</b>    | <b>2%</b>    | <b>34%</b>    | <b>46%</b>    | <b>15%</b>    | <b>2%</b>    | <b>100%</b>   |
| <b>Females</b> | Italy                      | 1633         | 1243         | 16246         | 23410         | 28525         | 12697        | 83754         |
|                | United Kingdom             | 1316         | 1035         | 13879         | 17190         | 17692         | 6533         | 57645         |
|                | Romania                    | 1639         | 2823         | 10146         | 12228         | 5724          | 343          | 32903         |
|                | Hungary                    | 166          | 299          | 3496          | 7512          | 6645          | 1695         | 19813         |
|                | Austria                    | 164          | 433          | 3778          | 4793          | 4063          | 1708         | 14939         |
|                | Serbia                     | 248          | 963          | 3112          | 4429          | 2575          | 240          | 11567         |
|                | Croatia                    | 164          | 306          | 2089          | 2966          | 4372          | 1266         | 11163         |
|                | Slovakia                   | 0            | 516          | 2378          | 3783          | 3067          | 776          | 10520         |
|                | Bulgaria                   | 733          | 223          | 2646          | 4045          | 1759          | 189          | 9595          |
|                | Lithuania                  | 163          | 379          | 1166          | 3478          | 1531          | 245          | 6962          |
|                | Denmark                    | 167          | 298          | 1297          | 1571          | 1671          | 694          | 5698          |
|                | Slovenia                   | 0            | 76           | 965           | 1182          | 1397          | 585          | 4205          |
|                | Ireland                    | 245          | 75           | 906           | 1096          | 868           | 220          | 3410          |
|                | Estonia                    | 246          | 226          | 650           | 811           | 459           | 30           | 2422          |
|                | Luxembourg                 | 0            | 0            | 399           | 401           | 214           | 90           | 1104          |
|                | Cyprus                     | 0            | 0            | 180           | 347           | 334           | 102          | 963           |
|                | <b>Total</b>               | <b>6884</b>  | <b>8895</b>  | <b>63333</b>  | <b>89242</b>  | <b>80896</b>  | <b>27413</b> | <b>276663</b> |
|                | <b>Proportion of total</b> | <b>2%</b>    | <b>3%</b>    | <b>23%</b>    | <b>32%</b>    | <b>29%</b>    | <b>10%</b>   | <b>100%</b>   |

Included causes of death: injuries to the head (S00–S09); injuries involving multiple body regions (T00–T07); injuries to unspecified trunk, limb, or body region (T08–T14); certain early complications of trauma (T79); and sequelae of injuries, of poisoning, and of other consequences of external causes (T90–T98). YLL, year of lost life.
