# Supplementary material for: Years of life lost due to traumatic brain injury in Europe: A cross-sectional analysis of 16 countries
Source: PubMed Central journal article supplement (PMC5507416; doi:10.1371/journal.pmed.1002331), 2017-07-11
Supplement: pmed.1002331.s014.pdf [file pmed.1002331.s014.pdf]

S11 Table. Crude and age-adjusted injury YLL rates in 16 European countries by age group and sex.

|         | Age-group      | 0 - 4 | 5 - 14 | 15 - 34 | 35 - 64 | 65 - 84 | 85+    | crude rate | age-adjusted rate (95% CI)    |
|---------|----------------|-------|--------|---------|---------|---------|--------|------------|-------------------------------|
| Total   | Lithuania      | 157.6 | 230.3  | 1145.7  | 1449.7  | 817.8   | 596.6  | 1068.2     | 1049.2 (1037.7 - 1060.9)      |
|         | Croatia        | 256.2 | 153.1  | 1059.1  | 760.1   | 1202.5  | 2419.4 | 850.7      | 856.6 (847.7 - 865.6)         |
|         | Slovakia       | 53.2  | 208.7  | 802.3   | 895.6   | 1129.0  | 1639.8 | 792.2      | 813.8 (805.9 - 821.8)         |
|         | Estonia        | 431.2 | 219.6  | 997.3   | 1021.2  | 577.2   | 241.7  | 813.4      | 802.8 (787.7 - 818.2)         |
|         | Romania        | 437.7 | 307.5  | 888.1   | 816.3   | 559.0   | 237.1  | 714.8      | 700.4 (696.8 - 704.1)         |
|         | Luxembourg     | 251.1 | 212.3  | 673.7   | 780.3   | 863.3   | 1343.9 | 677.8      | 694.0 (671.4 - 717.2)         |
|         | Serbia         | 143.3 | 225.5  | 924.7   | 721.5   | 629.7   | 414.0  | 678.0      | 663.5 (657.6 - 669.4)         |
|         | Hungary        | 136.7 | 94.0   | 589.6   | 742.7   | 897.7   | 1369.9 | 647.6      | 646.3 (641.3 - 651.4)         |
|         | Slovenia       | 0.0   | 147.8  | 693.2   | 565.0   | 1031.4  | 1927.2 | 625.8      | 635.0 (624.0 - 646.1)         |
|         | Austria        | 97.2  | 117.8  | 724.0   | 647.8   | 881.1   | 1229.1 | 640.7      | 634.4 (629.1 - 639.8)         |
|         | Bulgaria       | 389.0 | 178.5  | 911.9   | 705.4   | 431.9   | 330.1  | 638.9      | 625.3 (619.6 - 631.0)         |
|         | Cyprus         | 0.0   | 152.0  | 793.8   | 432.3   | 792.2   | 1291.2 | 546.7      | 549.3 (533.1 - 565.9)         |
|         | Italy          | 115.4 | 69.0   | 646.2   | 390.7   | 579.6   | 1032.0 | 456.7      | 451.0 (449.3 - 452.7)         |
|         | Ireland        | 107.7 | 76.3   | 430.6   | 288.4   | 422.1   | 504.4  | 300.3      | 318.3 (312.9 - 323.8)         |
|         | Denmark        | 104.1 | 83.9   | 346.5   | 294.2   | 425.8   | 906.3  | 305.3      | 311.8 (307.1 - 316.5)         |
|         | United Kingdom | 70.7  | 40.4   | 371.9   | 282.3   | 388.6   | 706.6  | 290.8      | 295.3 (293.9 - 296.6)         |
| Pooled  |                |       |        |         |         |         |        |            | <b>627.9 (522.9 - 733.0)</b>  |
| Males   | Lithuania      | 97.0  | 187.4  | 1945.5  | 2497.1  | 1433.8  | 786.8  | 1807.8     | 1767.1 (1744.7 - 1789.8)      |
|         | Estonia        | 200.4 | 95.4   | 1565.4  | 1816.9  | 1034.2  | 622.8  | 1348.1     | 1323.5 (1294.6 - 1353.1)      |
|         | Slovakia       | 103.7 | 220.0  | 1271.6  | 1476.7  | 1692.7  | 1680.7 | 1227.1     | 1262.4 (1247.7 - 1277.3)      |
|         | Croatia        | 347.0 | 156.3  | 1692.9  | 1200.4  | 1446.8  | 2111.7 | 1219.0     | 1225.8 (1210.2 - 1241.6)      |
|         | Romania        | 526.9 | 341.3  | 1338.4  | 1356.3  | 898.3   | 360.1  | 1127.1     | 1096.1 (1089.5 - 1102.7)      |
|         | Serbia         | 133.0 | 169.7  | 1466.5  | 1178.0  | 962.4   | 445.0  | 1060.7     | 1029.1 (1018.5 - 1039.8)      |
|         | Bulgaria       | 343.0 | 280.4  | 1473.3  | 1156.3  | 717.5   | 506.4  | 1041.6     | 1004.5 (994.2 - 1015.0)       |
|         | Luxembourg     | 488.7 | 414.3  | 787.8   | 1184.8  | 1185.3  | 1318.5 | 948.8      | 973.4 (934.9 - 1013.6)        |
|         | Austria        | 109.0 | 126.9  | 1079.3  | 1035.1  | 1296.5  | 1422.6 | 951.5      | 953.6 (944.1 - 963.2)         |
|         | Hungary        | 195.9 | 123.0  | 879.6   | 1166.6  | 1219.4  | 1462.6 | 939.6      | 950.7 (941.6 - 960.0)         |
|         | Slovenia       | 0.0   | 209.3  | 966.4   | 848.5   | 1389.1  | 1904.2 | 851.7      | 882.3 (863.2 - 901.9)         |
|         | Cyprus         | 0.0   | 296.0  | 1461.0  | 690.2   | 1023.2  | 939.6  | 894.1      | 860.2 (831.7 - 889.7)         |
|         | Italy          | 108.2 | 91.6   | 1025.6  | 611.8   | 716.9   | 1096.2 | 655.5      | 658.7 (655.7 - 661.6)         |
|         | Ireland        | 80.6  | 126.3  | 723.0   | 456.2   | 527.0   | 467.8  | 457.0      | 477.5 (468.0 - 487.2)         |
|         | Denmark        | 97.1  | 76.5   | 496.4   | 447.8   | 509.9   | 948.7  | 410.8      | 424.2 (416.4 - 432.2)         |
|         | United Kingdom | 73.9  | 51.2   | 574.9   | 431.2   | 441.3   | 774.6  | 408.5      | 416.3 (414.0 - 418.6)         |
| Pooled  |                |       |        |         |         |         |        |            | <b>956.6 (782.6 - 1130.6)</b> |
| Females | Croatia        | 159.6 | 149.3  | 398.7   | 330.3   | 1035.9  | 2531.0 | 507.1      | 493.2 (484.1 - 502.5)         |
|         | Lithuania      | 221.3 | 275.9  | 310.7   | 535.9   | 486.5   | 539.4  | 436.4      | 429.2 (419.1 - 439.5)         |
|         | Luxembourg     | 0.0   | 0.0    | 556.2   | 357.3   | 591.1   | 1355.9 | 406.6      | 412.6 (388.4 - 438.0)         |
|         | Slovakia       | 0.0   | 196.6  | 310.6   | 326.5   | 767.7   | 1623.8 | 379.0      | 399.5 (391.8 - 407.3)         |
|         | Slovenia       | 0.0   | 82.5   | 397.7   | 268.7   | 767.8   | 1935.2 | 404.3      | 392.3 (380.5 - 404.4)         |
|         | Hungary        | 74.2  | 63.4   | 286.7   | 343.0   | 697.7   | 1336.6 | 382.2      | 370.4 (365.3 - 375.7)         |
|         | Estonia        | 673.1 | 351.3  | 394.1   | 292.7   | 330.9   | 141.6  | 344.6      | 345.2 (331.5 - 359.3)         |
|         | Austria        | 84.8  | 108.2  | 358.7   | 265.8   | 548.1   | 1152.9 | 344.2      | 331.9 (326.5 - 337.3)         |
|         | Romania        | 343.3 | 271.8  | 409.2   | 286.0   | 324.5   | 175.2  | 321.6      | 320.7 (317.2 - 324.1)         |
|         | Serbia         | 154.3 | 284.5  | 357.2   | 282.4   | 380.3   | 397.7  | 314.6      | 313.7 (308.0 - 319.5)         |
|         | Bulgaria       | 437.5 | 70.8   | 310.6   | 259.4   | 232.2   | 239.5  | 257.2      | 254.7 (249.6 - 259.9)         |
|         | Cyprus         | 0.0   | 0.0    | 132.5   | 198.5   | 590.8   | 1525.1 | 217.7      | 250.8 (234.8 - 267.6)         |
|         | Italy          | 123.1 | 45.1   | 255.4   | 176.6   | 468.7   | 1003.6 | 269.8      | 248.7 (247.0 - 250.4)         |
|         | Denmark        | 111.0 | 91.7   | 191.8   | 139.8   | 351.0   | 886.0  | 201.3      | 200.1 (194.9 - 205.4)         |
|         | United Kingdom | 67.2  | 29.1   | 165.8   | 136.9   | 342.6   | 672.2  | 176.9      | 176.8 (175.4 - 178.3)         |
|         | Ireland        | 135.8 | 23.8   | 145.0   | 122.4   | 326.1   | 521.2  | 146.8      | 162.3 (156.7 - 168.0)         |
| Pooled  |                |       |        |         |         |         |        |            | <b>318.9 (271.1 - 366.6)</b>  |

Included causes of death: injuries to the head (S00–S09); injuries involving multiple body regions (T00–T07); injuries to unspecified trunk, limb, or body region (T08–T14); certain early complications of trauma (T79); and sequelae of injuries, of poisoning, and of other consequences of external causes (T90–T98). YLL, year of lost life.

Meta-analysis heterogeneity:  $I^2$  for total= 99.9% (95%CI: 99.9% to 99.9%);  $I^2$  for males= 99.9% (95%CI: 99.9% to 99.9%);  $I^2$  for females= 99.7% (95%CI: 99.7% to 99.7%);
