# Supplementary material for: Years of life lost due to traumatic brain injury in Europe: A cross-sectional analysis of 16 countries
Source: PubMed Central journal article supplement (PMC5507416; doi:10.1371/journal.pmed.1002331), 2017-07-11
Supplement: pmed.1002331.s015.pdf [file pmed.1002331.s015.pdf]

S12 Table. Contribution of TBI YLLs to injury YLLs by country, age group, and sex.

| Age-group      | 0 - 4      | 5 - 14     | 15 - 34    | 35 - 64    | 65 - 84    | 85+        | TOTAL      |
|----------------|------------|------------|------------|------------|------------|------------|------------|
| Estonia        | 100%       | 74%        | 61%        | 66%        | 61%        | 47%        | 65%        |
| Ireland        | 40%        | 100%       | 55%        | 53%        | 43%        | 36%        | 53%        |
| Denmark        | 76%        | 88%        | 58%        | 52%        | 36%        | 14%        | 50%        |
| Lithuania      | 35%        | 44%        | 44%        | 50%        | 52%        | 35%        | 48%        |
| Serbia         | 65%        | 68%        | 48%        | 44%        | 49%        | 33%        | 47%        |
| Cyprus         | -          | 0          | 56%        | 40%        | 26%        | 13%        | 43%        |
| Slovakia       | 50%        | 63%        | 33%        | 44%        | 41%        | 21%        | 40%        |
| Bulgaria       | 64%        | 53%        | 35%        | 39%        | 47%        | 32%        | 39%        |
| Romania        | 57%        | 36%        | 33%        | 40%        | 44%        | 48%        | 38%        |
| Hungary        | 76%        | 39%        | 42%        | 39%        | 34%        | 20%        | 38%        |
| United Kingdom | 72%        | 43%        | 32%        | 38%        | 40%        | 31%        | 37%        |
| Luxembourg     | 0          | 50%        | 43%        | 33%        | 35%        | 21%        | 35%        |
| Austria        | 81%        | 49%        | 27%        | 34%        | 46%        | 35%        | 35%        |
| Croatia        | 57%        | 43%        | 32%        | 42%        | 28%        | 16%        | 34%        |
| Italy          | 56%        | 51%        | 39%        | 32%        | 31%        | 17%        | 34%        |
| Slovenia       | -          | 0          | 24%        | 30%        | 28%        | 18%        | 26%        |
| <b>Average</b> | <b>59%</b> | <b>50%</b> | <b>41%</b> | <b>42%</b> | <b>40%</b> | <b>27%</b> | <b>41%</b> |
| Estonia        | 100%       | 100%       | 70%        | 68%        | 72%        | 42%        | 69%        |
| Ireland        | 51%        | 100%       | 55%        | 53%        | 38%        | 40%        | 54%        |
| Denmark        | 49%        | 75%        | 56%        | 55%        | 43%        | 18%        | 52%        |
| Lithuania      | 0%         | 50%        | 44%        | 51%        | 63%        | 36%        | 50%        |
| Cyprus         | -          | 0%         | 62%        | 40%        | 29%        | 18%        | 48%        |
| Serbia         | 100%       | 66%        | 48%        | 45%        | 53%        | 52%        | 48%        |
| Slovakia       | 50%        | 57%        | 34%        | 47%        | 49%        | 37%        | 43%        |
| Hungary        | 67%        | 22%        | 44%        | 40%        | 44%        | 31%        | 42%        |
| Bulgaria       | 87%        | 58%        | 35%        | 41%        | 48%        | 41%        | 41%        |
| Luxembourg     | 0%         | 50%        | 54%        | 35%        | 40%        | 43%        | 40%        |
| Romania        | 49%        | 31%        | 34%        | 42%        | 47%        | 61%        | 40%        |
| Croatia        | 60%        | 39%        | 32%        | 46%        | 38%        | 30%        | 40%        |
| United Kingdom | 65%        | 50%        | 30%        | 38%        | 44%        | 38%        | 37%        |
| Austria        | 67%        | 63%        | 28%        | 35%        | 49%        | 47%        | 36%        |
| Italy          | 45%        | 50%        | 39%        | 33%        | 36%        | 22%        | 35%        |
| Slovenia       | -          | 0%         | 28%        | 33%        | 33%        | 33%        | 31%        |
| <b>Average</b> | <b>56%</b> | <b>51%</b> | <b>43%</b> | <b>44%</b> | <b>45%</b> | <b>37%</b> | <b>44%</b> |
| Ireland        | 34%        | 100%       | 53%        | 50%        | 51%        | 34%        | 50%        |
| Estonia        | 100%       | 66%        | 20%        | 54%        | 40%        | 53%        | 48%        |
| Serbia         | 33%        | 69%        | 50%        | 42%        | 43%        | 23%        | 46%        |
| Denmark        | 100%       | 100%       | 63%        | 43%        | 27%        | 12%        | 44%        |
| Lithuania      | 51%        | 40%        | 40%        | 46%        | 36%        | 34%        | 42%        |
| United Kingdom | 81%        | 30%        | 36%        | 39%        | 36%        | 26%        | 37%        |
| Bulgaria       | 45%        | 33%        | 38%        | 28%        | 44%        | 22%        | 35%        |
| Romania        | 70%        | 42%        | 29%        | 30%        | 38%        | 34%        | 34%        |
| Slovakia       | -          | 71%        | 30%        | 33%        | 30%        | 15%        | 32%        |
| Austria        | 100%       | 32%        | 23%        | 28%        | 40%        | 29%        | 31%        |
| Hungary        | 100%       | 75%        | 36%        | 35%        | 24%        | 16%        | 31%        |
| Italy          | 65%        | 53%        | 39%        | 30%        | 26%        | 15%        | 29%        |
| Luxembourg     | -          | -          | 28%        | 23%        | 27%        | 12%        | 25%        |
| Croatia        | 49%        | 49%        | 27%        | 27%        | 18%        | 12%        | 23%        |
| Cyprus         | -          | -          | 0%         | 37%        | 22%        | 11%        | 22%        |
| Slovenia       | -          | 0%         | 12%        | 19%        | 21%        | 13%        | 17%        |
| <b>Average</b> | <b>69%</b> | <b>54%</b> | <b>33%</b> | <b>35%</b> | <b>33%</b> | <b>23%</b> | <b>34%</b> |

Included causes of death: injuries to the head (S00–S09); injuries involving multiple body regions (T00–T07); injuries to unspecified trunk, limb, or body region (T08–T14); certain early complications of trauma (T79); and sequelae of injuries, of poisoning, and of other consequences of external causes (T90–T98). YLL, year of lost life.
