# Supplementary material for: Years of life lost due to traumatic brain injury in Europe: A cross-sectional analysis of 16 countries
Source: PubMed Central journal article supplement (PMC5507416; doi:10.1371/journal.pmed.1002331), 2017-07-11
Supplement: pmed.1002331.s017.pdf [file pmed.1002331.s017.pdf]

**S14 Table: Crude and age-adjusted injury YLL rates in 16 European countries in 2013 by age-group and sex (all causes of death included)**

|                | 3                     | 0 - 4  | 5 - 14 | 15 - 34 | 35 - 64 | 65 - 84 | 85+    | crude rate                      | age-adjusted rate (95% CI) |
|----------------|-----------------------|--------|--------|---------|---------|---------|--------|---------------------------------|----------------------------|
| <b>Total</b>   | <b>Lithuania</b>      | 679.2  | 495.3  | 4037.4  | 5300.0  | 1911.3  | 1013.1 | 3638.7                          | 3554.2 (3533.0 - 3575.5)   |
|                | <b>Estonia</b>        | 1496.6 | 430.9  | 3200.9  | 2990.1  | 1315.1  | 562.8  | 2382.3                          | 2339.1 (2313.2 - 2365.1)   |
|                | <b>Romania</b>        | 1309.8 | 609.6  | 1683.8  | 1883.9  | 1054.6  | 458.9  | 1523.5                          | 1490.4 (1485.1 - 1495.7)   |
|                | <b>Slovakia</b>       | 324.2  | 349.5  | 1433.2  | 1924.7  | 1562.1  | 1809.0 | 1494.1                          | 1488.9 (1478.5 - 1499.5)   |
|                | <b>Croatia</b>        | 405.6  | 168.8  | 1706.0  | 1534.7  | 1689.0  | 2560.3 | 1428.8                          | 1421.0 (1409.7 - 1432.4)   |
|                | <b>Slovenia</b>       | 70.4   | 147.8  | 1590.7  | 1573.1  | 1793.7  | 2192.5 | 1411.8                          | 1398.4 (1382.3 - 1414.6)   |
|                | <b>Hungary</b>        | 380.0  | 188.0  | 1169.1  | 1898.2  | 1527.9  | 1677.2 | 1414.9                          | 1390.7 (1383.4 - 1398.1)   |
|                | <b>Luxembourg</b>     | 511.9  | 212.3  | 1037.7  | 1499.7  | 1572.4  | 1727.9 | 1188.0                          | 1215.9 (1186.0 - 1246.5)   |
|                | <b>Serbia</b>         | 474.1  | 285.0  | 1424.9  | 1358.5  | 1068.6  | 670.5  | 1173.0                          | 1145.6 (1137.9 - 1153.5)   |
|                | <b>Bulgaria</b>       | 737.7  | 369.7  | 1411.5  | 1230.1  | 806.9   | 539.2  | 1087.7                          | 1065.2 (1057.7 - 1072.6)   |
|                | <b>Austria</b>        | 251.9  | 203.8  | 1200.3  | 1170.8  | 1353.2  | 1505.3 | 1078.3                          | 1064.9 (1058.0 - 1071.9)   |
|                | <b>Ireland</b>        | 171.0  | 139.8  | 1625.2  | 1230.5  | 718.1   | 606.9  | 1034.6                          | 1049.6 (1040.0 - 1059.3)   |
|                | <b>United Kingdom</b> | 168.4  | 90.1   | 1071.6  | 1026.6  | 592.6   | 806.1  | 807.8                           | 812.2 (810.0 - 814.4)      |
|                | <b>Cyprus</b>         | 0.0    | 237.2  | 1116.3  | 716.0   | 956.9   | 1480.8 | 789.5                           | 783.7 (764.5 - 803.3)      |
|                | <b>Denmark</b>        | 358.7  | 114.6  | 783.8   | 1000.7  | 734.1   | 1050.4 | 765.8                           | 775.0 (767.7 - 782.4)      |
|                | <b>Italy</b>          | 215.6  | 116.5  | 1043.4  | 660.3   | 725.5   | 1109.2 | 696.6                           | 692.5 (690.4 - 694.6)      |
| <b>Pooled</b>  |                       |        |        |         |         |         |        | <b>1355.5 (1083.8 - 1627.1)</b> |                            |
| <b>Males</b>   | <b>Lithuania</b>      | 796.1  | 558.2  | 6632.6  | 9203.4  | 3442.4  | 1369.2 | 6275.8                          | 6039.8 (5998.9 - 6081.0)   |
|                | <b>Estonia</b>        | 1202.5 | 400.8  | 5083.1  | 5037.2  | 2428.1  | 1133.2 | 3945.8                          | 3805.3 (3756.9 - 3854.5)   |
|                | <b>Slovakia</b>       | 413.8  | 468.3  | 2365.2  | 3153.2  | 2477.6  | 2020.6 | 2403.4                          | 2388.6 (2369.0 - 2408.4)   |
|                | <b>Romania</b>        | 1589.0 | 742.4  | 2628.6  | 3100.0  | 1681.3  | 673.6  | 2427.5                          | 2350.2 (2340.6 - 2359.8)   |
|                | <b>Croatia</b>        | 486.7  | 187.0  | 2792.4  | 2446.7  | 2167.8  | 2349.3 | 2157.2                          | 2133.3 (2113.0 - 2153.7)   |
|                | <b>Hungary</b>        | 423.0  | 218.4  | 1771.9  | 2964.2  | 2262.9  | 1914.8 | 2126.2                          | 2103.5 (2090.2 - 2116.9)   |
|                | <b>Slovenia</b>       | 136.3  | 209.3  | 2437.4  | 2432.0  | 2425.4  | 2454.2 | 2092.7                          | 2073.4 (2045.0 - 2102.3)   |
|                | <b>Serbia</b>         | 536.0  | 245.2  | 2230.9  | 2106.7  | 1626.1  | 838.7  | 1789.7                          | 1739.8 (1726.1 - 1753.7)   |
|                | <b>Bulgaria</b>       | 601.3  | 586.1  | 2283.4  | 2036.0  | 1314.3  | 807.3  | 1769.0                          | 1710.7 (1697.2 - 1724.3)   |
|                | <b>Luxembourg</b>     | 488.7  | 414.3  | 1359.8  | 1959.4  | 2044.2  | 1804.2 | 1540.4                          | 1582.5 (1533.4 - 1633.4)   |
|                | <b>Ireland</b>        | 162.1  | 228.1  | 2559.5  | 1885.3  | 911.7   | 645.0  | 1570.6                          | 1582.1 (1565.4 - 1599.0)   |
|                | <b>Austria</b>        | 369.1  | 206.2  | 1791.2  | 1771.6  | 1924.6  | 1822.2 | 1570.9                          | 1561.3 (1549.2 - 1573.4)   |
|                | <b>Cyprus</b>         | 0.0    | 296.0  | 2068.2  | 1143.0  | 1298.2  | 1083.7 | 1294.5                          | 1239.6 (1205.6 - 1274.7)   |
|                | <b>United Kingdom</b> | 201.1  | 106.2  | 1632.3  | 1510.6  | 676.9   | 906.3  | 1163.4                          | 1163.0 (1159.2 - 1166.8)   |
|                | <b>Denmark</b>        | 437.5  | 115.7  | 1131.5  | 1465.9  | 919.5   | 1097.4 | 1071.1                          | 1083.6 (1071.2 - 1096.1)   |
|                | <b>Italy</b>          | 232.5  | 143.5  | 1634.5  | 1030.8  | 924.4   | 1214.0 | 1024.9                          | 1024.7 (1021.0 - 1028.4)   |
| <b>Pooled</b>  |                       |        |        |         |         |         |        | <b>2098.8 (1585.2 - 2612.5)</b> |                            |
| <b>Females</b> | <b>Lithuania</b>      | 555.8  | 429.5  | 1328.6  | 1894.8  | 1088.8  | 907.5  | 1386.5                          | 1369.1 (1351.0 - 1387.3)   |
|                | <b>Estonia</b>        | 1806.6 | 462.7  | 1202.7  | 1115.5  | 715.1   | 413.3  | 1012.0                          | 1013.5 (990.0 - 1037.5)    |
|                | <b>Luxembourg</b>     | 533.7  | 0.0    | 705.1   | 1019.0  | 1173.6  | 1708.5 | 835.1                           | 850.8 (815.9 - 886.9)      |
|                | <b>Hungary</b>        | 334.1  | 155.9  | 539.6   | 892.9   | 1070.9  | 1592.2 | 768.5                           | 746.8 (739.5 - 754.2)      |
|                | <b>Croatia</b>        | 319.5  | 149.3  | 573.9   | 644.5   | 1362.6  | 2637.3 | 749.5                           | 728.7 (717.6 - 740.0)      |
|                | <b>Slovenia</b>       | 0.0    | 82.5   | 675.0   | 675.4   | 1327.9  | 2107.9 | 743.9                           | 723.0 (707.0 - 739.4)      |
|                | <b>Romania</b>        | 1014.4 | 469.5  | 679.0   | 689.7   | 621.4   | 350.6  | 661.7                           | 659.1 (654.1 - 664.1)      |
|                | <b>Slovakia</b>       | 229.7  | 224.3  | 456.9   | 721.3   | 975.5   | 1726.8 | 630.2                           | 646.9 (637.3 - 656.7)      |
|                | <b>Austria</b>        | 127.9  | 201.2  | 593.0   | 578.2   | 895.0   | 1380.8 | 608.5                           | 591.7 (584.5 - 598.9)      |
|                | <b>Serbia</b>         | 408.1  | 327.2  | 580.8   | 639.0   | 651.0   | 581.3  | 587.7                           | 579.8 (572.0 - 587.6)      |
|                | <b>Ireland</b>        | 180.5  | 47.7   | 712.8   | 582.3   | 541.6   | 588.5  | 509.5                           | 528.0 (518.3 - 537.8)      |
|                | <b>United Kingdom</b> | 134.2  | 73.1   | 502.2   | 554.2   | 519.2   | 755.2  | 463.5                           | 466.9 (464.5 - 469.2)      |
|                | <b>Denmark</b>        | 275.8  | 113.5  | 425.1   | 533.0   | 569.6   | 1028.6 | 465.3                           | 466.7 (458.7 - 474.7)      |
|                | <b>Bulgaria</b>       | 881.1  | 140.6  | 477.8   | 433.2   | 452.0   | 403.0  | 442.0                           | 436.6 (429.9 - 443.3)      |
|                | <b>Italy</b>          | 197.8  | 87.9   | 434.5   | 301.5   | 564.8   | 1062.7 | 388.0                           | 368.5 (366.4 - 370.6)      |
|                | <b>Cyprus</b>         | 0.0    | 174.6  | 172.9   | 328.6   | 660.5   | 1743.0 | 311.2                           | 349.6 (331.0 - 369.2)      |
| <b>Pooled</b>  |                       |        |        |         |         |         |        | <b>657.9 (549.0 - 766.7)</b>    |                            |

Meta-analysis heterogeneity:  $I^2$  for total= 100% (95%CI: 100% to 100%);  $I^2$  for males= 100% (95%CI: 100% to 100%);  $I^2$  for females= 99.9% (95%CI: 99.9% to 99.9%);

YLL=Years of Lost Life
