# Supplementary material for: Years of life lost due to traumatic brain injury in Europe: A cross-sectional analysis of 16 countries
Source: PubMed Central journal article supplement (PMC5507416; doi:10.1371/journal.pmed.1002331), 2017-07-11
Supplement: pmed.1002331.s018.pdf [file pmed.1002331.s018.pdf]

**S15 Table: Contribution of TBI YLLs to injury YLLs in 16 European countries in 2013 by age-group and sex (all causes of death included)**

| <b>Age-group</b>      | <b>0 - 4</b> | <b>5 - 14</b> | <b>15 - 34</b> | <b>35 - 64</b> | <b>65 - 84</b> | <b>85+</b> | <b>TOTAL</b> |
|-----------------------|--------------|---------------|----------------|----------------|----------------|------------|--------------|
| <b>Cyprus</b>         | -            | 0             | 40%            | 24%            | 22%            | 11%        | 30%          |
| <b>Serbia</b>         | 20%          | 54%           | 31%            | 23%            | 29%            | 21%        | 27%          |
| <b>Bulgaria</b>       | 34%          | 26%           | 23%            | 22%            | 25%            | 19%        | 23%          |
| <b>Estonia</b>        | 29%          | 37%           | 19%            | 22%            | 27%            | 20%        | 22%          |
| <b>Italy</b>          | 30%          | 30%           | 24%            | 19%            | 25%            | 16%        | 22%          |
| <b>Slovakia</b>       | 8%           | 38%           | 19%            | 20%            | 30%            | 19%        | 21%          |
| <b>Austria</b>        | 31%          | 28%           | 16%            | 19%            | 30%            | 28%        | 21%          |
| <b>Croatia</b>        | 36%          | 39%           | 20%            | 21%            | 20%            | 15%        | 21%          |
| <b>Luxembourg</b>     | 0            | 50%           | 28%            | 17%            | 19%            | 17%        | 20%          |
| <b>Denmark</b>        | 22%          | 65%           | 26%            | 15%            | 21%            | 12%        | 20%          |
| <b>Romania</b>        | 19%          | 18%           | 18%            | 17%            | 23%            | 25%        | 18%          |
| <b>Hungary</b>        | 27%          | 20%           | 21%            | 15%            | 20%            | 17%        | 18%          |
| <b>Ireland</b>        | 25%          | 55%           | 14%            | 12%            | 25%            | 30%        | 15%          |
| <b>Lithuania</b>      | 8%           | 21%           | 12%            | 14%            | 22%            | 20%        | 14%          |
| <b>United Kingdom</b> | 30%          | 19%           | 11%            | 11%            | 26%            | 27%        | 13%          |
| <b>Slovenia</b>       | 0            | 0             | 10%            | 11%            | 16%            | 15%        | 12%          |
| <b>Average</b>        | <b>21%</b>   | <b>31%</b>    | <b>21%</b>     | <b>18%</b>     | <b>24%</b>     | <b>20%</b> | <b>20%</b>   |
| <b>Cyprus</b>         | -            | 0%            | 44%            | 24%            | 23%            | 16%        | 33%          |
| <b>Serbia</b>         | 25%          | 46%           | 32%            | 25%            | 31%            | 27%        | 28%          |
| <b>Luxembourg</b>     | 0%           | 50%           | 31%            | 21%            | 23%            | 31%        | 25%          |
| <b>Bulgaria</b>       | 50%          | 28%           | 22%            | 23%            | 26%            | 26%        | 24%          |
| <b>Estonia</b>        | 17%          | 24%           | 22%            | 24%            | 31%            | 23%        | 24%          |
| <b>Italy</b>          | 21%          | 32%           | 24%            | 20%            | 28%            | 20%        | 23%          |
| <b>Croatia</b>        | 43%          | 32%           | 20%            | 23%            | 25%            | 27%        | 22%          |
| <b>Austria</b>        | 20%          | 39%           | 17%            | 20%            | 33%            | 37%        | 22%          |
| <b>Slovakia</b>       | 13%          | 27%           | 18%            | 22%            | 33%            | 31%        | 22%          |
| <b>Denmark</b>        | 11%          | 50%           | 25%            | 17%            | 24%            | 16%        | 20%          |
| <b>Romania</b>        | 16%          | 14%           | 18%            | 18%            | 25%            | 33%        | 18%          |
| <b>Hungary</b>        | 31%          | 12%           | 22%            | 16%            | 24%            | 24%        | 18%          |
| <b>Ireland</b>        | 25%          | 55%           | 16%            | 13%            | 22%            | 29%        | 16%          |
| <b>Lithuania</b>      | 0%           | 17%           | 13%            | 14%            | 26%            | 21%        | 14%          |
| <b>United Kingdom</b> | 24%          | 24%           | 11%            | 11%            | 28%            | 32%        | 13%          |
| <b>Slovenia</b>       | 0%           | 0%            | 11%            | 11%            | 19%            | 25%        | 12%          |
| <b>Average</b>        | <b>20%</b>   | <b>28%</b>    | <b>21%</b>     | <b>19%</b>     | <b>26%</b>     | <b>26%</b> | <b>21%</b>   |
| <b>Serbia</b>         | 13%          | 60%           | 30%            | 18%            | 25%            | 16%        | 24%          |
| <b>Bulgaria</b>       | 22%          | 17%           | 25%            | 17%            | 23%            | 13%        | 20%          |
| <b>Italy</b>          | 41%          | 27%           | 23%            | 18%            | 22%            | 14%        | 20%          |
| <b>Slovakia</b>       | 0%           | 63%           | 21%            | 15%            | 24%            | 14%        | 19%          |
| <b>Denmark</b>        | 40%          | 81%           | 28%            | 11%            | 17%            | 11%        | 19%          |
| <b>Austria</b>        | 66%          | 17%           | 14%            | 13%            | 25%            | 24%        | 18%          |
| <b>Romania</b>        | 24%          | 24%           | 17%            | 13%            | 20%            | 17%        | 17%          |
| <b>Estonia</b>        | 37%          | 50%           | 7%             | 14%            | 19%            | 18%        | 16%          |
| <b>Croatia</b>        | 25%          | 49%           | 19%            | 14%            | 14%            | 12%        | 15%          |
| <b>Hungary</b>        | 22%          | 31%           | 19%            | 13%            | 16%            | 13%        | 15%          |
| <b>Cyprus</b>         | -            | 0%            | 0%             | 22%            | 20%            | 10%        | 15%          |
| <b>Ireland</b>        | 25%          | 50%           | 11%            | 10%            | 31%            | 30%        | 14%          |
| <b>United Kingdom</b> | 41%          | 12%           | 12%            | 10%            | 24%            | 24%        | 14%          |
| <b>Lithuania</b>      | 20%          | 26%           | 9%             | 13%            | 16%            | 20%        | 13%          |
| <b>Luxembourg</b>     | 0%           | -             | 22%            | 8%             | 14%            | 10%        | 12%          |
| <b>Slovenia</b>       | -            | 0%            | 7%             | 8%             | 12%            | 12%        | 9%           |
| <b>Average</b>        | <b>27%</b>   | <b>34%</b>    | <b>17%</b>     | <b>14%</b>     | <b>20%</b>     | <b>16%</b> | <b>16%</b>   |

YLL=Years of Lost Life, TBI=Traumatic Brain Injury
